# Supplementary material for: Biliazine: a ring open phthalocyanine analog with amesohydrogen bond
Source: Royal Society of Chemistry journal article supplement (doi:10.1039/d0cc03060k), 2020-01-01
Supplement: d0cc03060k1.pdf [file d0cc03060k1.pdf]

# **Biliazine: A ring open phthalocyanine analog with a meso hydrogen bond.**

Briana R. Schrage,<sup>a</sup> Victor N. Nemykin,<sup>b</sup> and Christopher J. Ziegler<sup>a</sup>

*a Department of Chemistry, University of Akron, Akron, Ohio 44312-3601, United States*

*b Department of Chemistry, University of Manitoba, Winnipeg, Manitoba R3T 2N2, Canada*

## **Supplementary Information**

## Table of Contents

|                                                                                                               | Page   |
|---------------------------------------------------------------------------------------------------------------|--------|
| General Information                                                                                           | S4-5   |
| Full citation for Gaussian                                                                                    | S6     |
| Syntheses                                                                                                     | S7-9   |
| <b>Figure S1:</b> $^1\text{H}$ NMR (500 MHz) of <b>1</b> in d6-DMSO.                                          | S10    |
| <b>Figure S2:</b> $^1\text{H}$ NMR (500 MHz) of <b>5</b> in d6-DMSO.                                          | S11    |
| <b>Figure S3:</b> $^{13}\text{C}\{^1\text{H}\}$ NMR (125 MHz) of <b>1</b> in d6-DMSO.                         | S12    |
| <b>Figure S4:</b> $^{13}\text{C}\{^1\text{H}\}$ NMR (125 MHz) of <b>5</b> in d6-DMSO.                         | S13    |
| <b>Figure S5:</b> High-resolution ESI mass spectra of <b>1</b> .                                              | S14    |
| <b>Figure S6:</b> High-resolution ESI mass spectra of <b>2</b> .                                              | S15    |
| <b>Figure S7:</b> High-resolution ESI mass spectra of <b>3</b> .                                              | S16    |
| <b>Figure S8:</b> High-resolution ESI mass spectra of <b>4</b> .                                              | S17    |
| <b>Figure S9:</b> High-resolution ESI mass spectra of <b>5</b> .                                              | S18    |
| <b>Figure S10:</b> Cyclic voltammograms in DMF/0.1 TBAPF <sub>6</sub> .                                       | S19    |
| <b>Figure S11:</b> B3LYP DFT-predicted frontier orbitals for compounds <b>2-5</b> .                           | S20    |
| <b>Figure S12:</b> Experimental and B3LYP TDDFT-predicted spectra for compounds <b>2-5</b> .                  | S21    |
| <b>Figure S13:</b> B3LYP $\alpha$ -spin relative energies of the frontier orbitals for compounds <b>2-5</b> . | S22    |
| <b>Figure S14:</b> B3LYP $\beta$ -spin relative energies of the frontier orbitals for compounds <b>2-5</b> .  | S23    |
| <b>Figure S15:</b> UV–Vis and MCD spectra of <b>5</b> .                                                       | S24    |
| <b>Table S1:</b> X-ray crystal data and structure parameters for compounds <b>1</b> and <b>2</b> .            | S25    |
| <b>Table S2:</b> X-ray crystal data and structure parameters for compounds <b>3-5</b> .                       | S26    |
| <b>Table S3:</b> B3LYP TDDFT-predicted energies and expansion coefficients for compound <b>2</b> .            | S27    |
| <b>Table S4:</b> B3LYP TDDFT-predicted energies and expansion coefficients for compound <b>4</b> .            | S28-30 |
| <b>Table S5:</b> B3LYP TDDFT-predicted energies and expansion coefficients for compound <b>3</b> .            | S31-32 |

|                                                                                                    |        |
|----------------------------------------------------------------------------------------------------|--------|
| <b>Table S6:</b> B3LYP TDDFT-predicted energies and expansion coefficients for compound <b>5</b> . | S33    |
| <b>Table S7:</b> B3LYP DFT optimized geometry of compound <b>2</b> .                               | S34    |
| <b>Table S8:</b> B3LYP DFT optimized geometry of compound <b>4</b> .                               | S35-36 |
| <b>Table S9:</b> B3LYP DFT optimized geometry of compound <b>3</b> .                               | S37    |
| <b>Table S10:</b> B3LYP DFT optimized geometry of compound <b>5</b> .                              | S38-39 |

## General Information

### Experimental

All reagents and starting materials were purchased from commercial vendors and used without further purification. DII was synthesized according to previously published procedures.<sup>1</sup> Deuterated solvents were purchased from Cambridge Isotope Laboratories and used as received.

NMR spectra were recorded on 300 MHz and 500 MHz spectrometers and chemical shifts were given in ppm relative to residual solvent resonances (<sup>1</sup>H NMR and <sup>13</sup>C NMR spectra). High-resolution mass spectrometry experiments were performed on a Bruker MicroTOF-III and MicroTOF-qIII instruments. Infrared spectra were collected on Thermo Scientific Nicolet iS5 that was equipped with an iD5 ATR. UV-visible spectra were recorded on a Cary 100 Bio UV-visible spectrometer.

X-ray intensity data were measured on a Bruker CCD-based diffractometer with dual Cu/Mo ImuS microfocus optics (Cu K $\alpha$  radiation,  $\lambda$  = 1.54178 Å, Mo K $\alpha$  radiation,  $\lambda$  = 0.71073 Å). Crystals were mounted on a cryoloop using Paratone oil and placed under a stream of nitrogen at 100 K (Oxford Cryosystems). The detector was placed at a distance of 5.00 cm from the crystal. The data were corrected for absorption with the SADABS program. The structures were refined using the Bruker SHELXTL Software Package (Version 6.1),<sup>2</sup> and were solved using direct methods until the final anisotropic full-matrix, least squares refinement of F<sup>2</sup> converged.

Electrochemistry measurements were conducted using a CHI 820D potentiostat in a standard three-electrode configuration. Platinum wire was used as the counter electrode. The working electrode used was a 2 mm diameter platinum disk. A nonaqueous Ag/Ag<sup>+</sup> reference electrode was used by immersing silver wire in a degassed DMF solution of 0.01 M AgNO<sub>3</sub> / 0.1 M tetrabutylammonium hexafluorophosphate (TBAPF<sub>6</sub>). All potentials were referenced to the

ferrocene/ferrocenium couple. The concentration of analyte was 1.0 mM, and the supporting electrolyte was 0.1 M TBAPF<sub>6</sub> dissolved in DMF.

### **Computational Details**

The starting geometries of compounds **1** and **3** were optimized using a B3LYP exchange–correlation functional.<sup>3</sup> Energy minima in optimized geometry were confirmed by the frequency calculations (absence of the imaginary frequencies). The solvent effect was modeled using the polarized continuum model (PCM).<sup>4</sup> In all calculations, CHCl<sub>3</sub> was used as the solvent. In PCM-TDDFT calculation, the first 50 states were calculated. All atoms were modeled using the 6-311G(d)<sup>5</sup> basis set. Gaussian 09 software was used in all calculations.<sup>6</sup> The QMForge program was used for molecular orbital analysis in all cases.<sup>7</sup>

### **Full citation for Gaussian**

Gaussian 09, Revision D.01, Frisch, M. J.; Trucks, G. W.; Schlegel, H. B.; Scuseria, G. E.; Robb, M. A.; Cheeseman, J. R.; Montgomery, Jr., J. A.; Vreven, T.; Kudin, K. N.; Burant, J. C.; Millam, J. M.; Iyengar, S. S.; Tomasi, J.; Barone, V.; Mennucci, B.; Cossi, M.; Scalmani, G.; Rega, N.; Petersson, G. A.; Nakatsuji, H.; Hada, M.; Ehara, M.; Toyota, K.; Fukuda, R.; Hasegawa, J.; Ishida, M.; Nakajima, T.; Honda, Y.; Kitao, O.; Nakai, H.; Klene, M.; Li, X.; Knox, J. E.; Hratchian, H. P.; Cross, J. B.; Adamo, C.; Jaramillo, J.; Gomperts, R.; Stratmann, R. E.; Yazyev, O.; Austin, A. J.; Cammi, R.; Pomelli, C.; Ochterski, J. W.; Ayala, P. Y.; Morokuma, K.; Voth, G. A.; Salvador, P.; Dannenberg, J. J.; Zakrzewski, V. G.; Dapprich, S.; Daniels, A. D.; Strain, M. C.; Farkas, O.; Malick, D. K.; Rabuck, A. D.; Raghavachari, K.; Foresman, J. B.; Ortiz, J. V.; Cui, Q.; Baboul, A. G.; Clifford, S.; Cioslowski, J.; Stefanov, B. B.; Liu, G.; Liashenko, A.; Piskorz, P.; Komaromi, I.; Martin, R. L.; Fox, D. J.; Keith, T.; Al-Laham, M. A.; Peng, C. Y.; Nanayakkara, A.; Challacombe, M.; Gill, P. M. W.; Johnson, B.; Chen, W.; Wong, M. W.; Gonzalez, C.; Pople, J. A. Gaussian, Inc., Wallingford CT, 2009.

## Syntheses.

**Synthesis of 1.** 1,3-Diiminoisoindoline (1.00 g, 6.89 mmol) and 3-amino pyrazole (0.57 g, 6.89 mmol) were dissolved in methanol (20 mL) and stirred at room temperature for 1 hour. The resultant solid was filtered, washed with cold methanol, and air dried to give a yellow solid. Crystals suitable for X-ray diffraction were grown by slow evaporation from DMF.

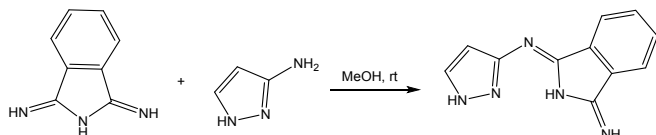

**1:** Yield: 1.16 g (79.6%).  $^1\text{H}$  NMR (300 MHz,  $d_6$  - DMSO):  $\delta$  = 12.66 (s, 1H), 8.70 (s, 2H), 7.90 (d,  $J$  = 7.0 Hz, 1H), 7.76 (d,  $J$  = 6.7 Hz, 1H), 7.57 (m, 2H), 7.47 (s, 1H), 6.64 (s, 1H).  $^{13}\text{C}\{^1\text{H}\}$  NMR (125 MHz,  $d_6$  - DMSO):  $\delta$  = 170.2, 163.8, 140.7, 134.4, 131.1, 129.9, 121.2, 100.5. HRMS (ESI-TOF, positive mode)  $m/z$ : calcd for  $\text{C}_{11}\text{H}_{10}\text{N}_5$  212.0931, found 212.0935  $[\text{M}+\text{H}]^+$ .

**Synthesis of  $\text{H}_2\text{BlzH}$  (2).** Compound **1** (0.10 g, 2.37 mmol) was dissolved in *n*-butanol (7 mL) and heated to a reflux for 1 hour. The resultant solid was filtered, washed with cold *n*-butanol, and air dried to give a red solid. Crystals suitable for X-ray diffraction were grown by slow evaporation from DMF.

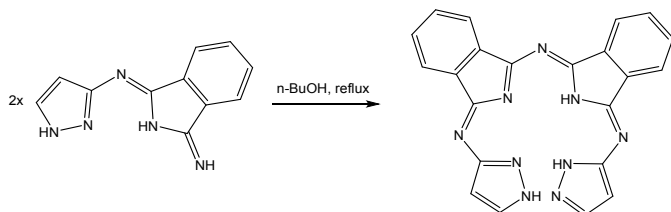

**$\text{H}_2\text{BlzH}$  (2):** Yield: 0.088 g (91.5%). HRMS (ESI-TOF, positive mode)  $m/z$ : calcd for  $\text{C}_{22}\text{H}_{15}\text{N}_9\text{Na}$  428.1343, found 428.1346  $[\text{M}+\text{Na}]^+$ .

**Synthesis of MBlzH complexes.** A solution of  $M(\text{OAc})_2$  hydrate ( $M = \text{Co}, \text{Cu}, \text{Zn}$ ) (0.12 mmol), and two equivalents of **1** (0.05 g, 0.24 mmol) in MeOH (4.00 mL) were heated until all of the solids dissolved. The mixture was then stirred at room temperature for 1 hour. The resultant precipitate was filtered and washed with cold MeOH. The compounds were isolated as brown  $(\text{Co}(\text{BlzH})(\text{MeOH})_2)$  (**4**), and red  $(\text{Cu}(\text{BlzH}))$  (**3**) and  $\text{Zn}(\text{BlzH})(\text{MeOH})_2$  (**5**) solids. Crystals suitable for X-ray diffraction were grown by slow evaporation of MeOH  $(\text{Co}(\text{BlzH})(\text{MeOH})_2)$ , and  $\text{Zn}(\text{BlzH})(\text{MeOH})_2$ , and slow evaporation of THF  $(\text{Cu}(\text{BlzH}))$ .



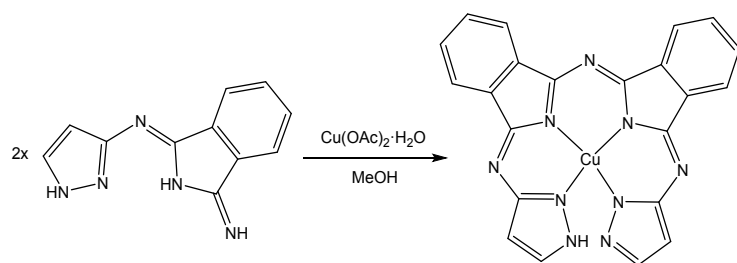

***Cu(BlzH) (3)***: Yield: 0.050 g (91.0%). HRMS (ESI-TOF, positive mode)  $m/z$ : calcd for  $C_{22}H_{14}CuN_9$  467.0663, found 467.0646  $[M+H]^+$ .

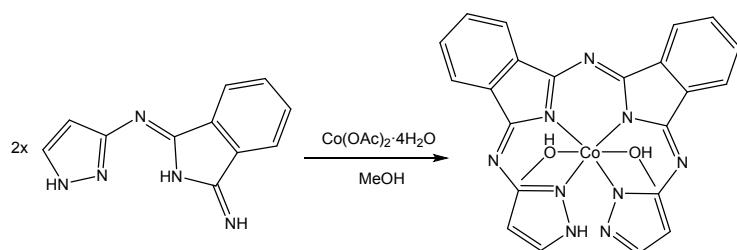

***Co(BlzH)(MeOH)<sub>2</sub> (4)***: Yield: 0.049 g (78.3%). HRMS (ESI-TOF, positive mode)  $m/z$ : calcd for  $C_{22}H_{14}CoN_9$  463.0699, found 463.0681  $[M+H]^+$ .

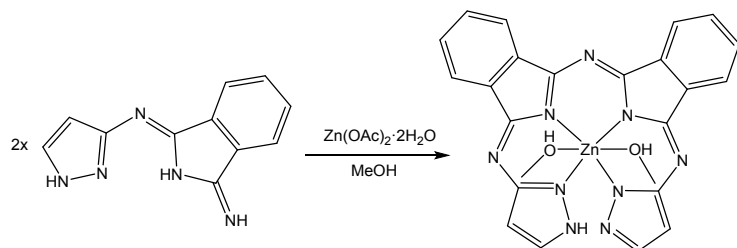

***Zn(BlzH)(MeOH)<sub>2</sub> (5)***: Yield: 0.052 g (82.2%).  $^1H$  NMR (500 MHz,  $d_6$ -DMSO):  $\delta$  = 16.73 (s, NH), 8.17 (m, 2H), 7.99 (m, 1H), 7.77 (m, 2H), 7.72 (m, 4H), 7.53 (d,  $J$  = 1.3 Hz, 2H), 6.63 (d,  $J$  = 1.3 Hz, 2H), 4.06 (q,  $J$  = 5.3 Hz,  $CH_3OH$ ), 3.17 (d,  $J$  = 5.0 Hz,  $CH_3OH$ ).  $^{13}C\{^1H\}$  NMR (125 MHz,  $d_6$ -DMSO):  $\delta$  = 172.8, 157.8, 156.0, 140.4, 138.7, 131.7, 130.6, 122.4, 121.6, 107.1. HRMS (ESI-TOF, positive mode)  $m/z$ : calcd for  $C_{22}H_{14}N_9Zn$  468.0658, found 468.0665  $[M+H]^+$ .

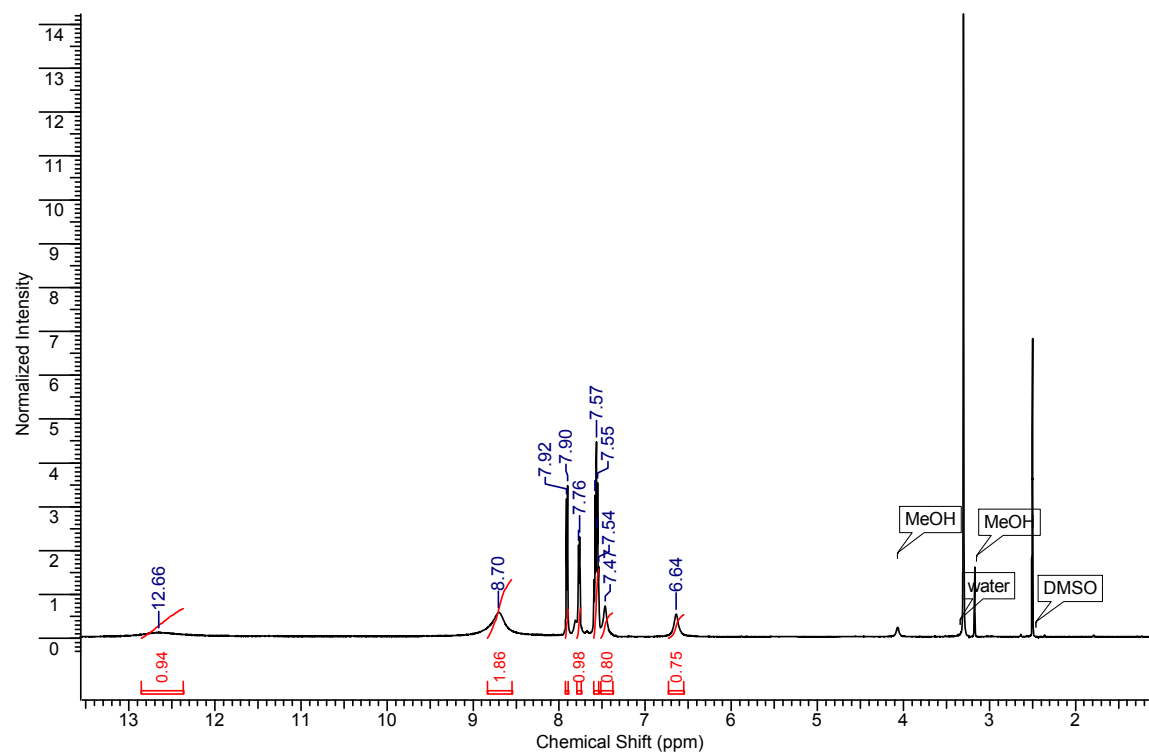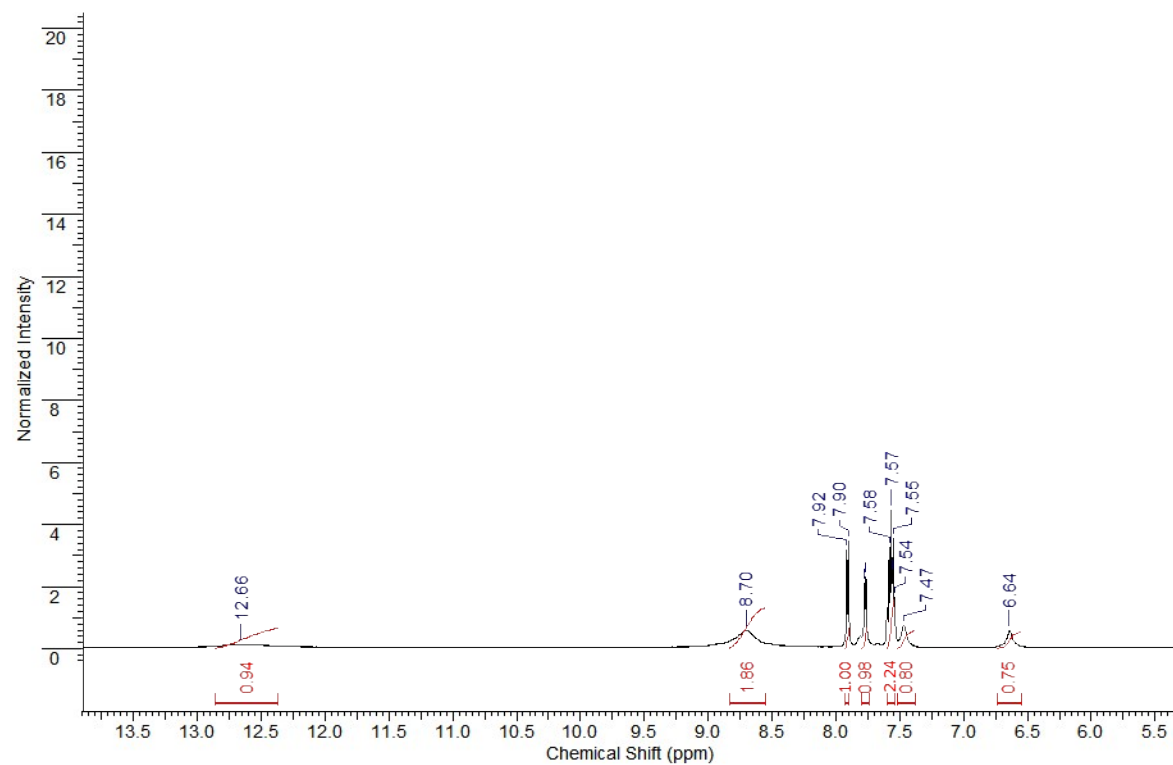

**Figure S1:** <sup>1</sup>H NMR (500 MHz) of **1** in d<sub>6</sub>-DMSO.

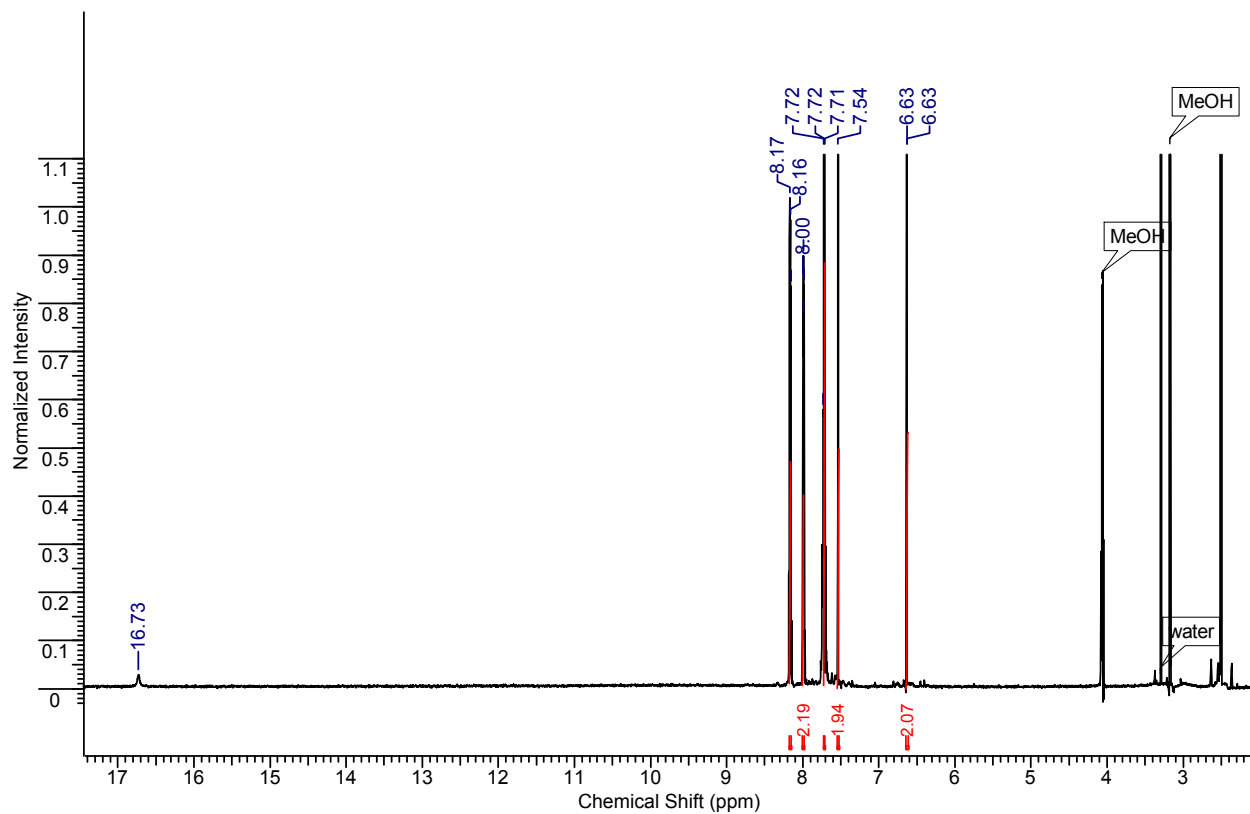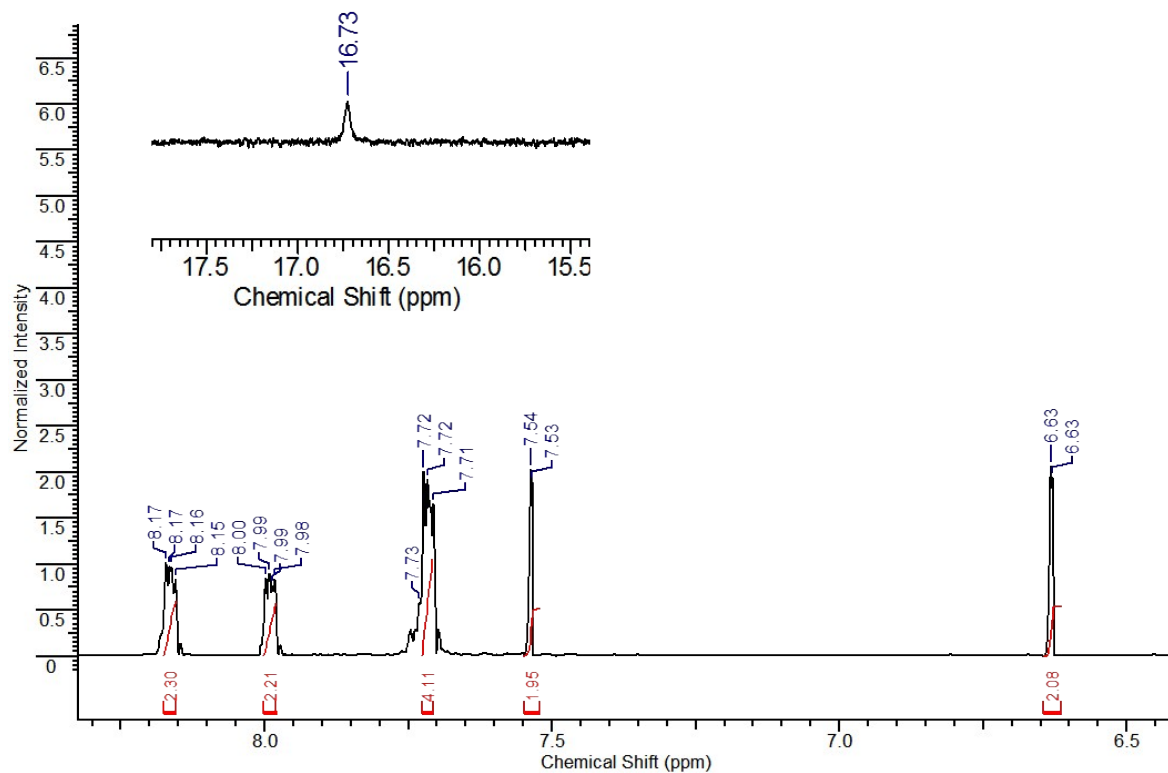

**Figure S2:**  $^1\text{H}$  NMR (500 MHz) of **5** in  $\text{d}_6\text{-DMSO}$ .

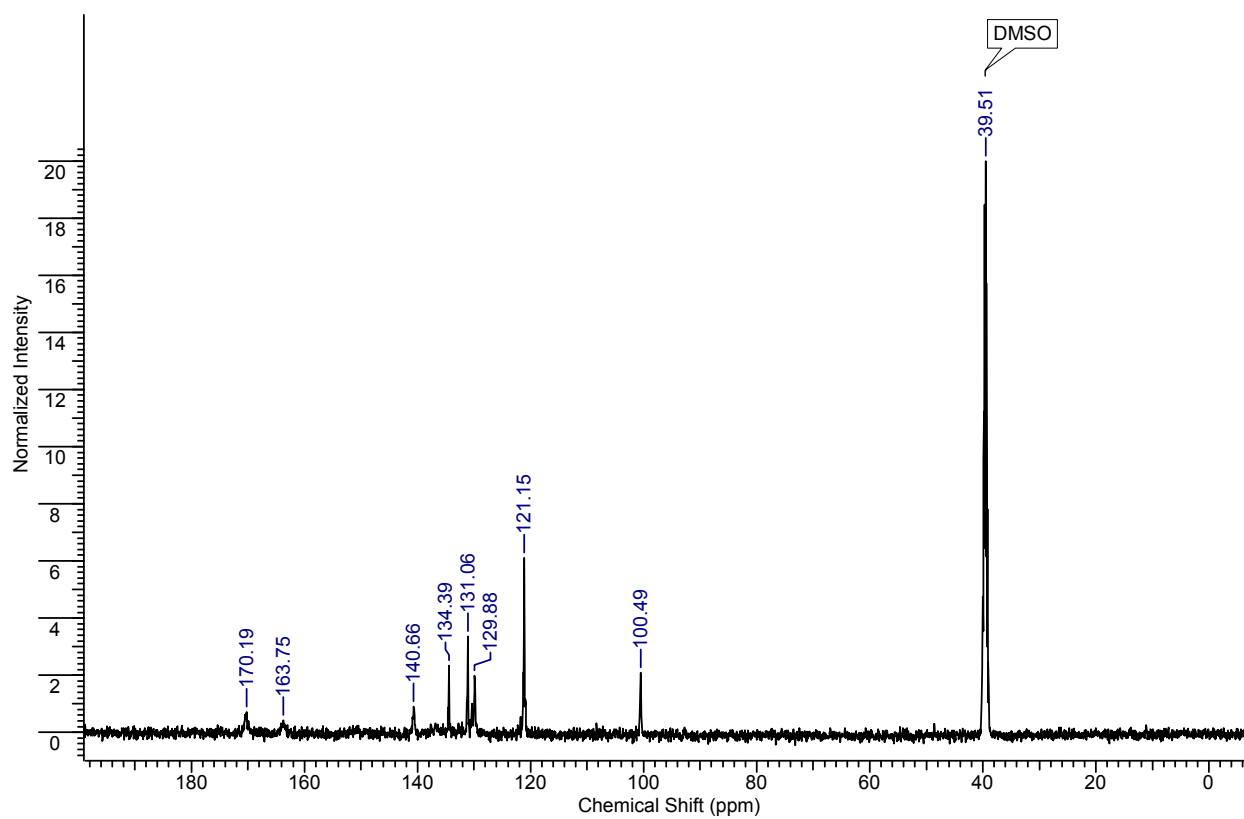

**Figure S3:**  $^{13}\text{C}\{^1\text{H}\}$  NMR (125 MHz) of **1** in  $\text{d}_6\text{-DMSO}$ .

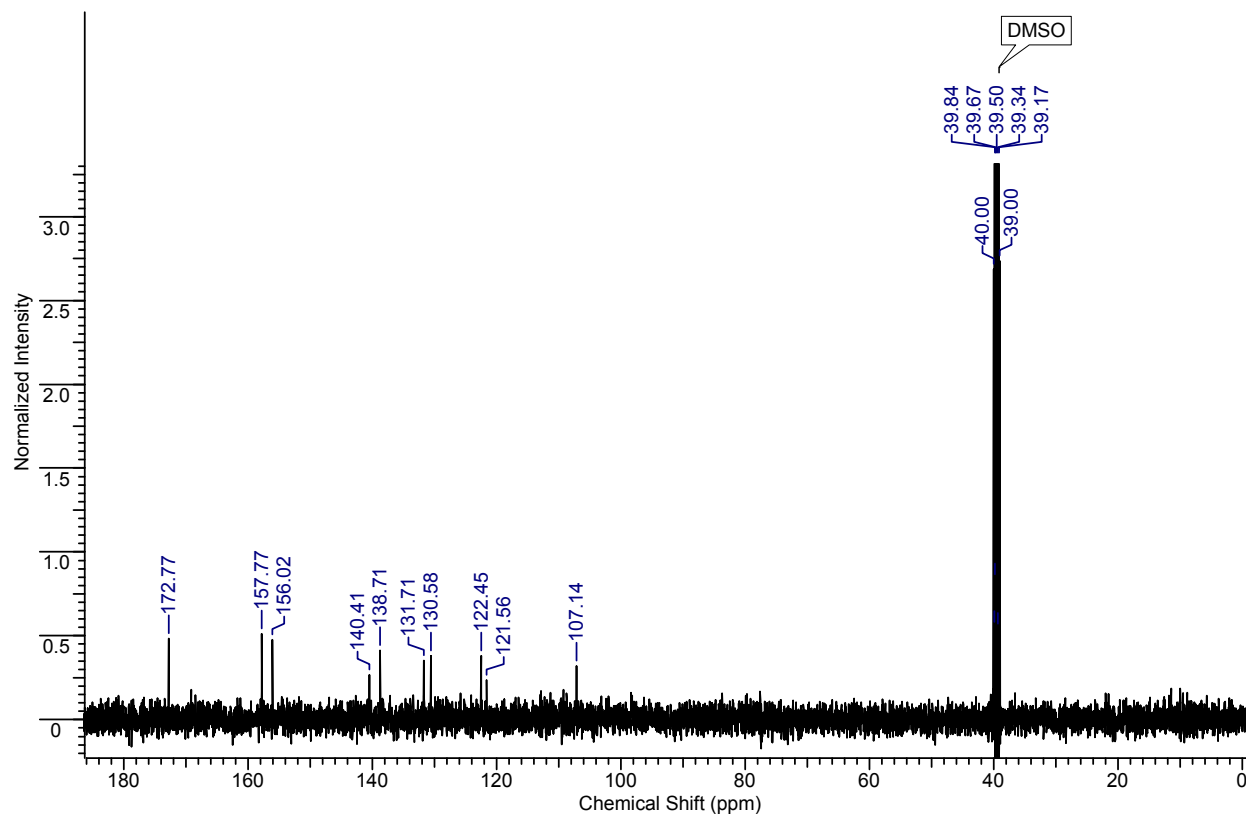

**Figure S4:**  $^{13}\text{C}\{^1\text{H}\}$  NMR (125 MHz) of **5** in  $\text{d}_6\text{-DMSO}$ .

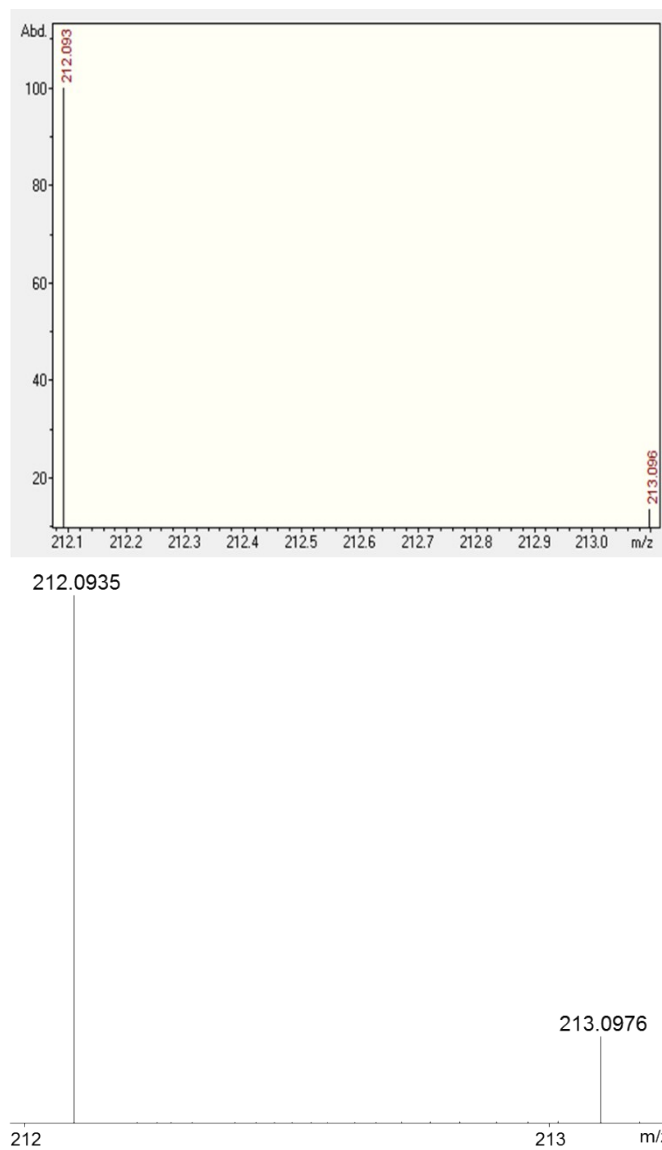

**Figure S5:** High-resolution ESI mass spectra of **1**. Top: calculated spectrum. Bottom: experimental spectrum.

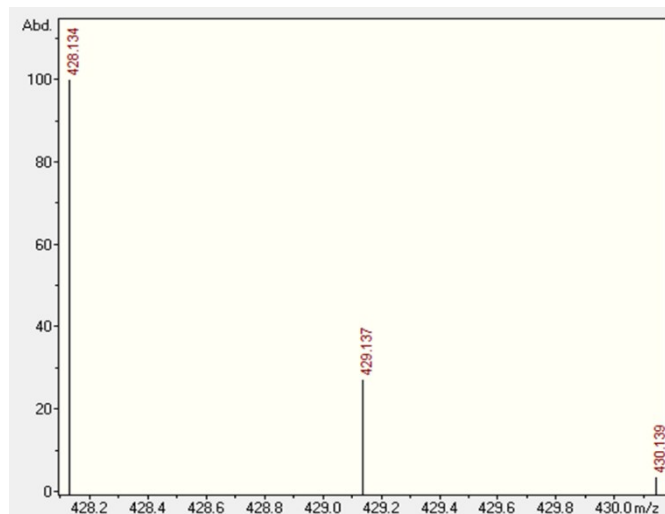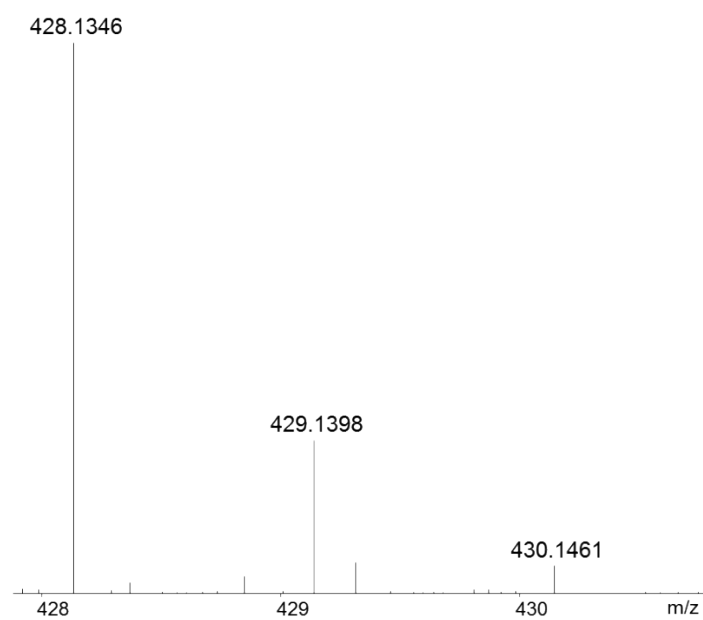

**Figure S6:** High-resolution ESI mass spectra of **2**. Top: calculated spectrum. Bottom: experimental spectrum.

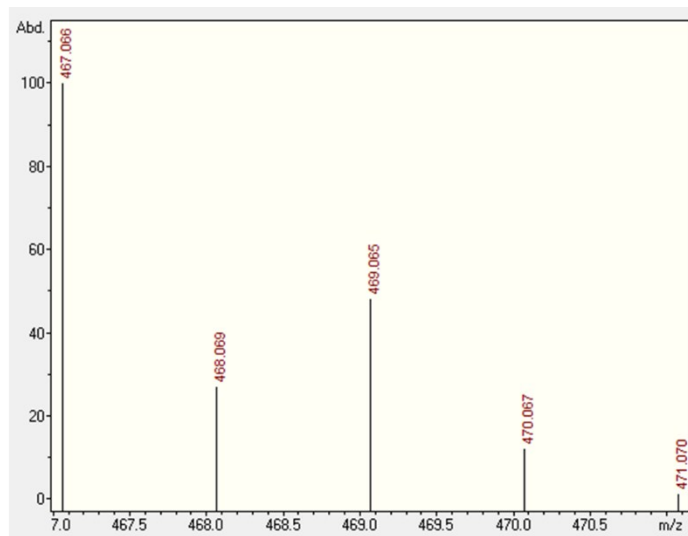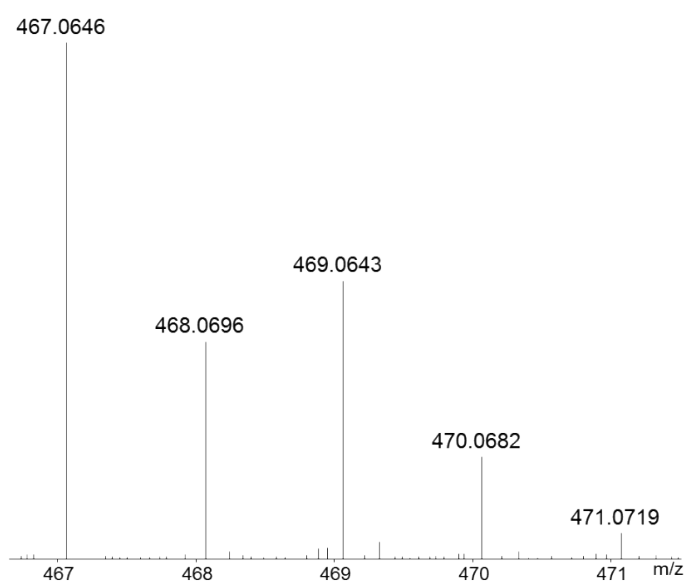

**Figure S8:** High-resolution ESI mass spectra of **3**. Top: calculated spectrum. Bottom: experimental spectrum.



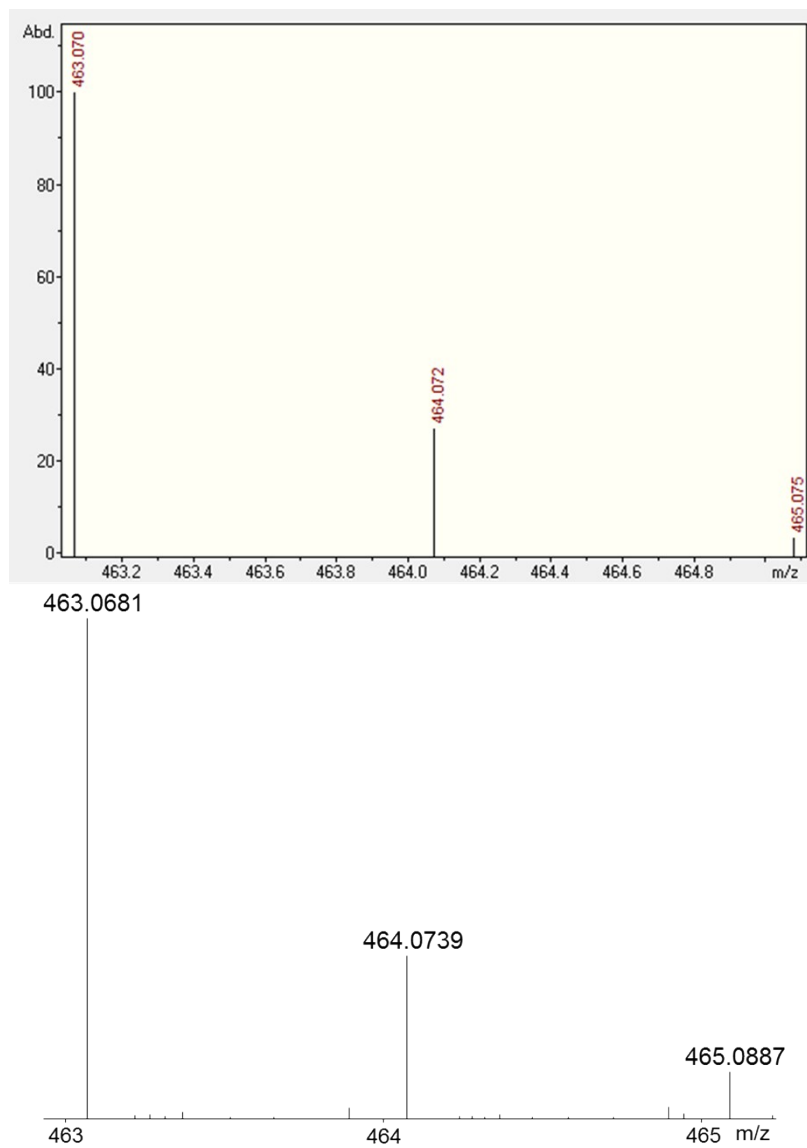

**Figure S7:** High-resolution ESI mass spectra of **4**. Top: calculated spectrum. Bottom: experimental spectrum.

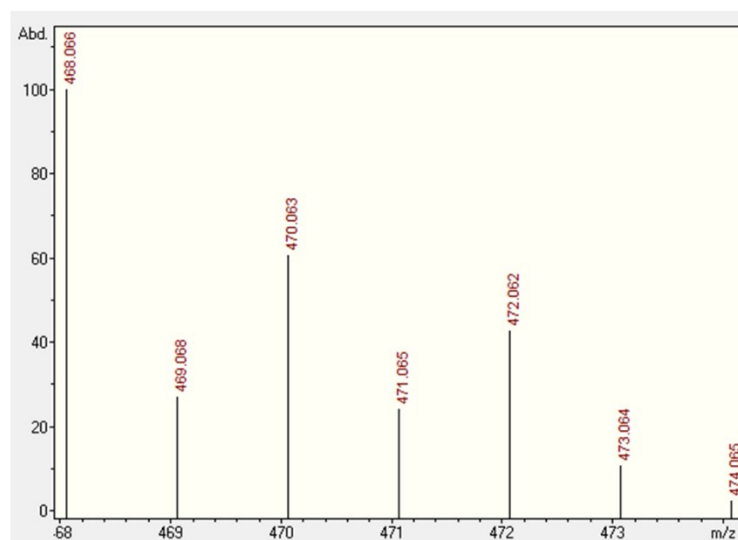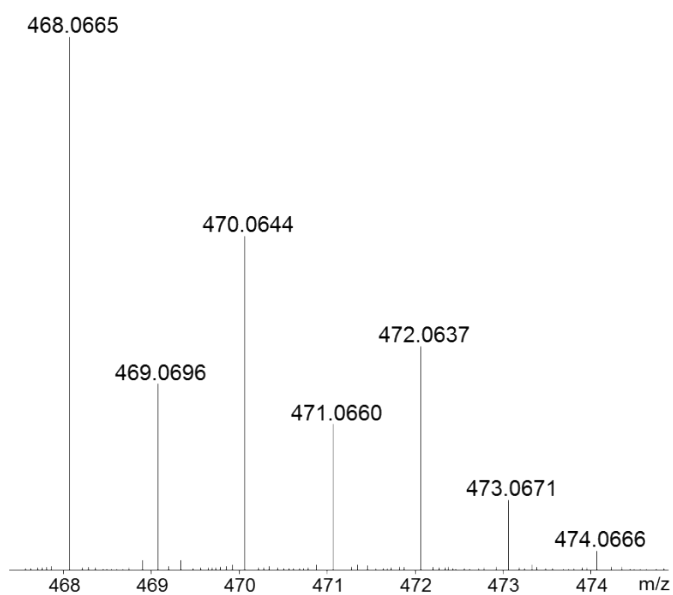

**Figure S9:** High-resolution ESI mass spectra of **5**. Top: calculated spectrum. Bottom: experimental spectrum.

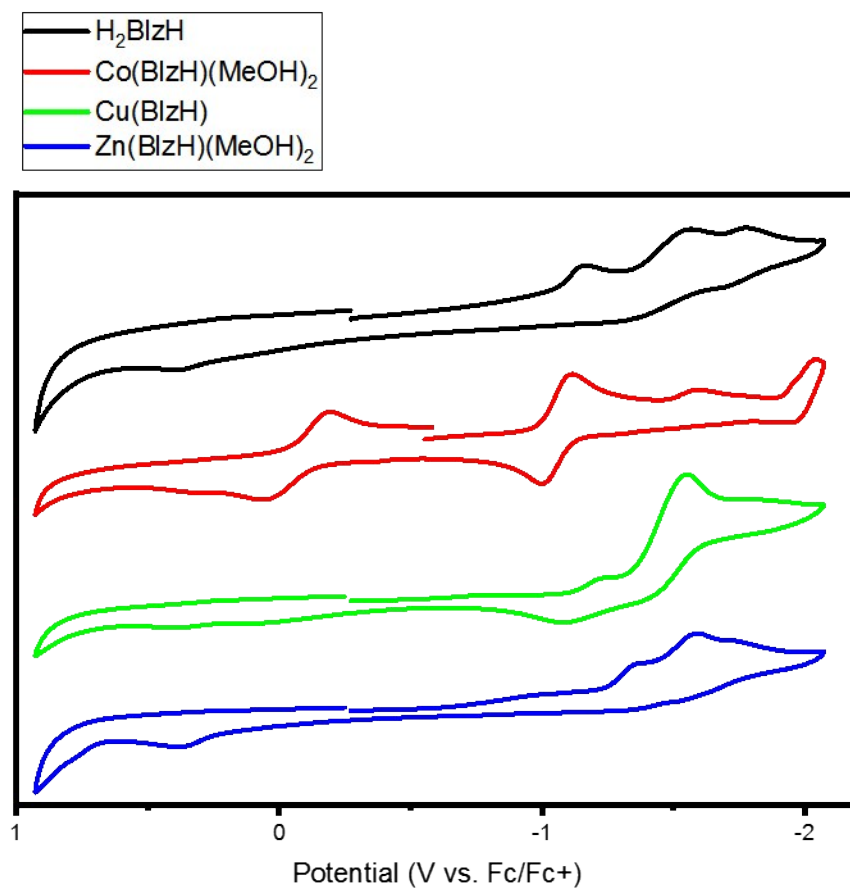

**Figure S10:** Cyclic voltammograms in DMF/0.1 TBAPF<sub>6</sub>.

# Compound

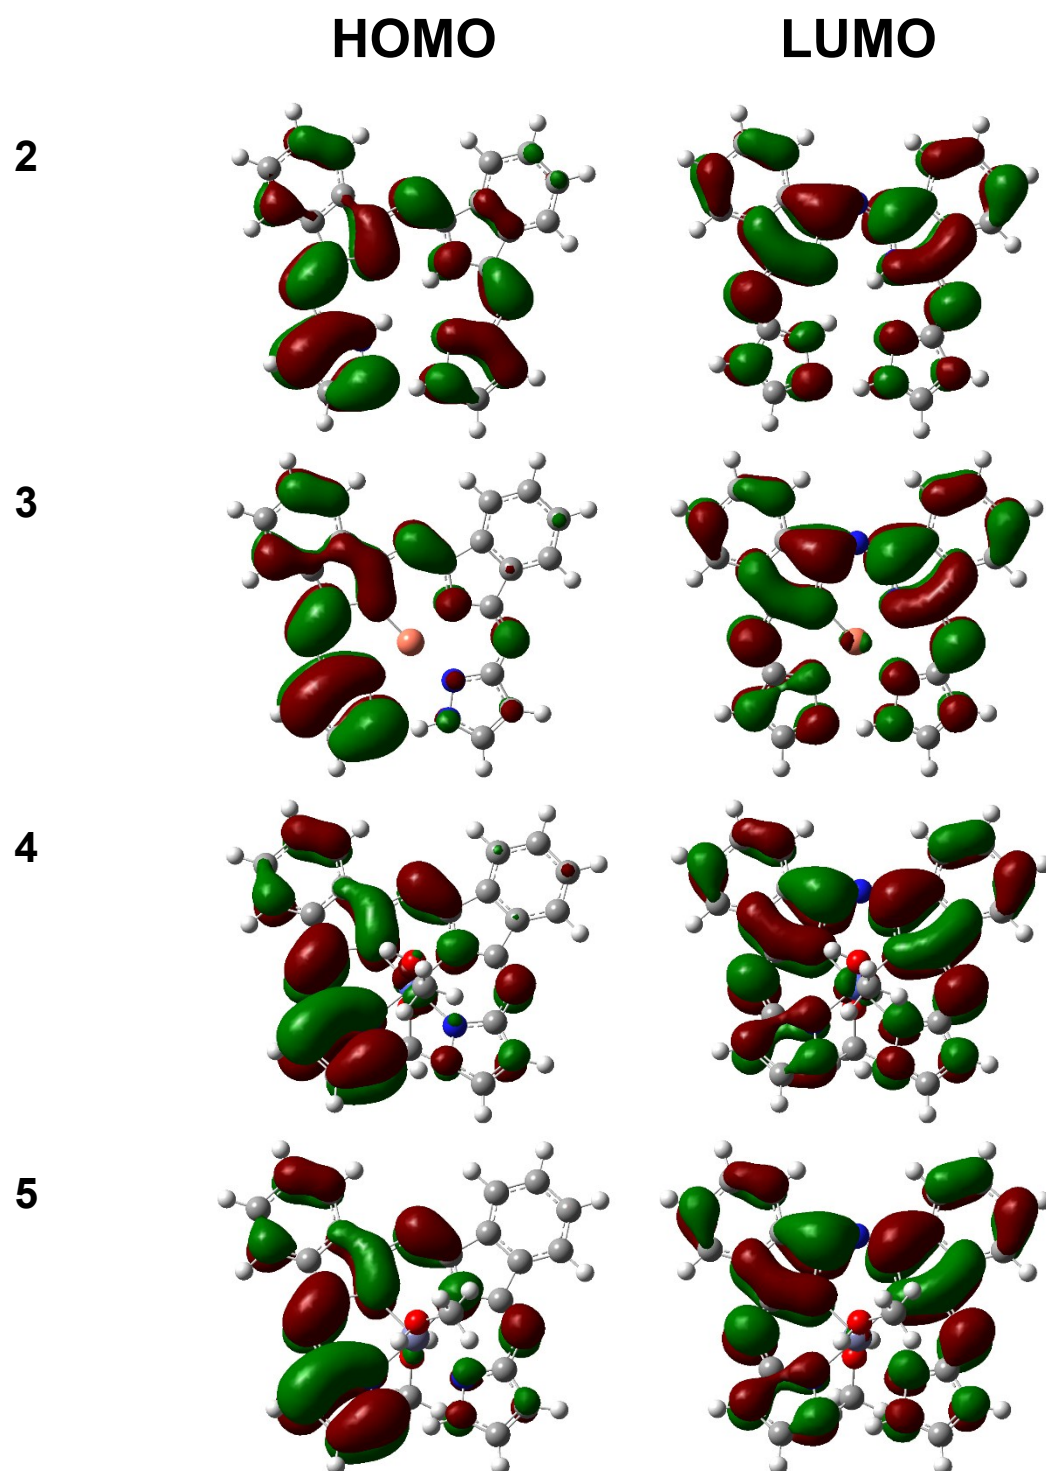

**Figure S11.** B3LYP DFT-predicted frontier orbitals for compounds 2-5.

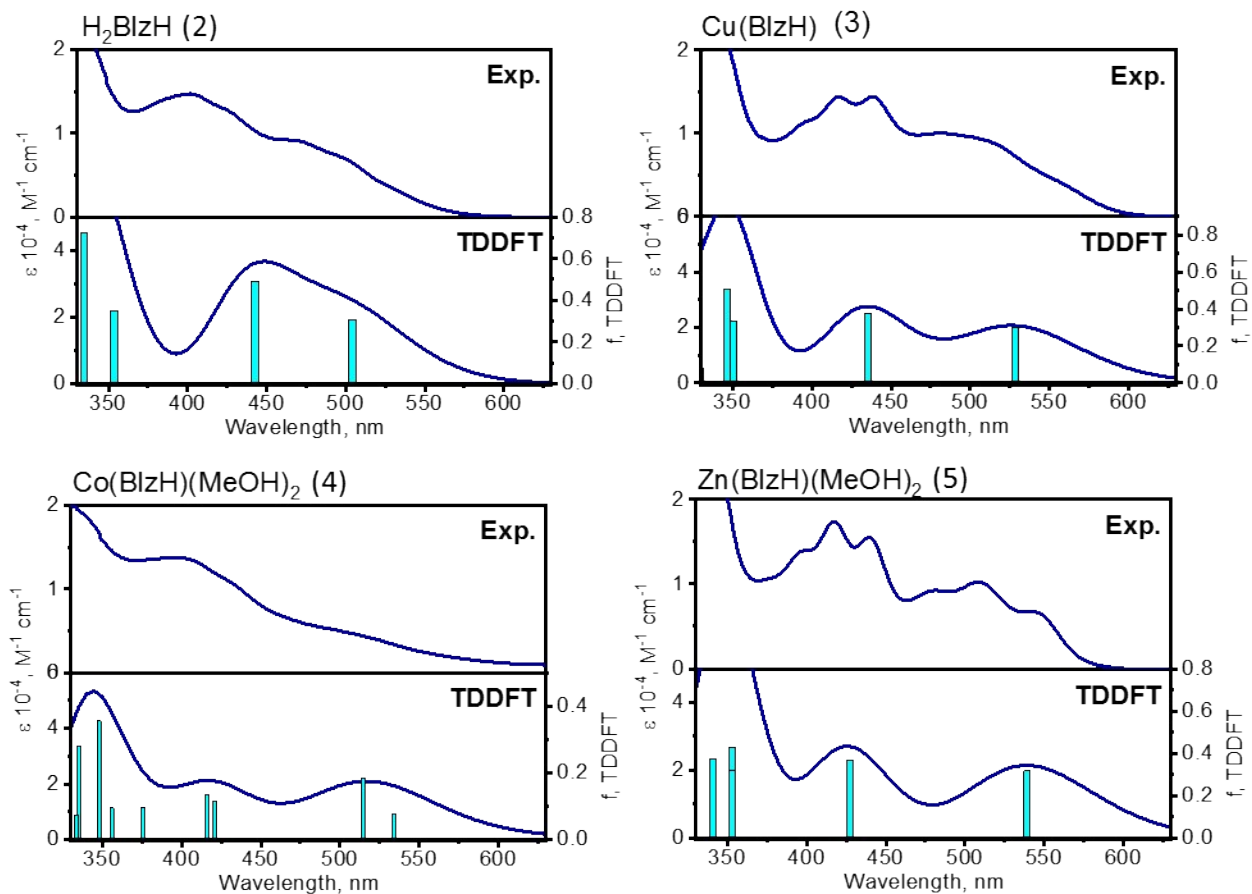

**Figure S12:** Experimental and B3LYP TDDFT-predicted spectra for compounds 2-5.

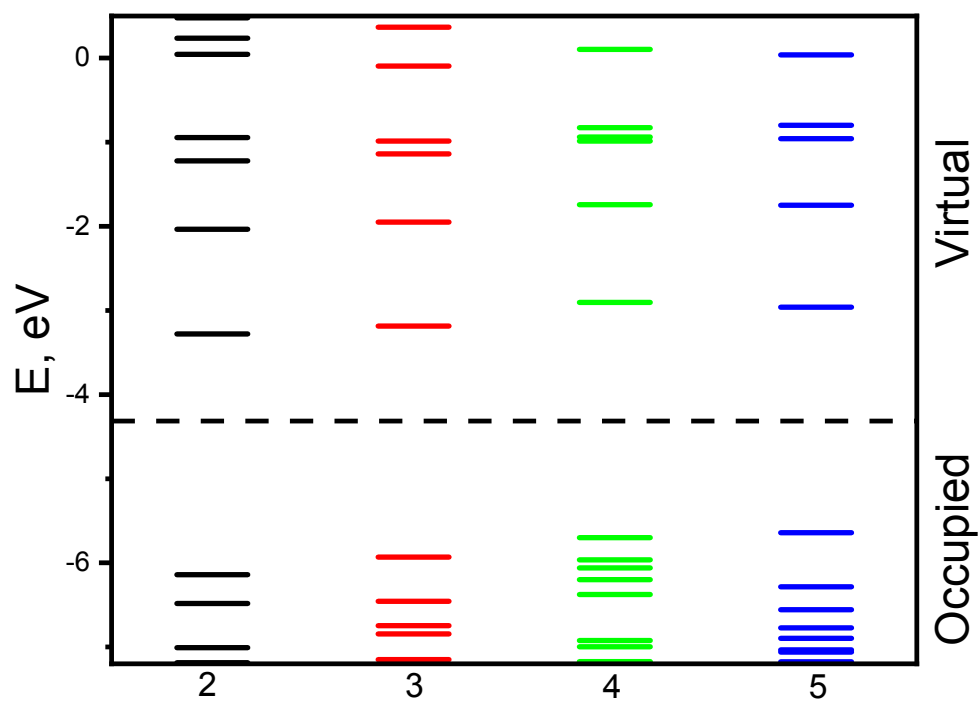

**Figure S13:** B3LYP  $\alpha$ -spin relative energies of the frontier orbitals for compounds 2-5.

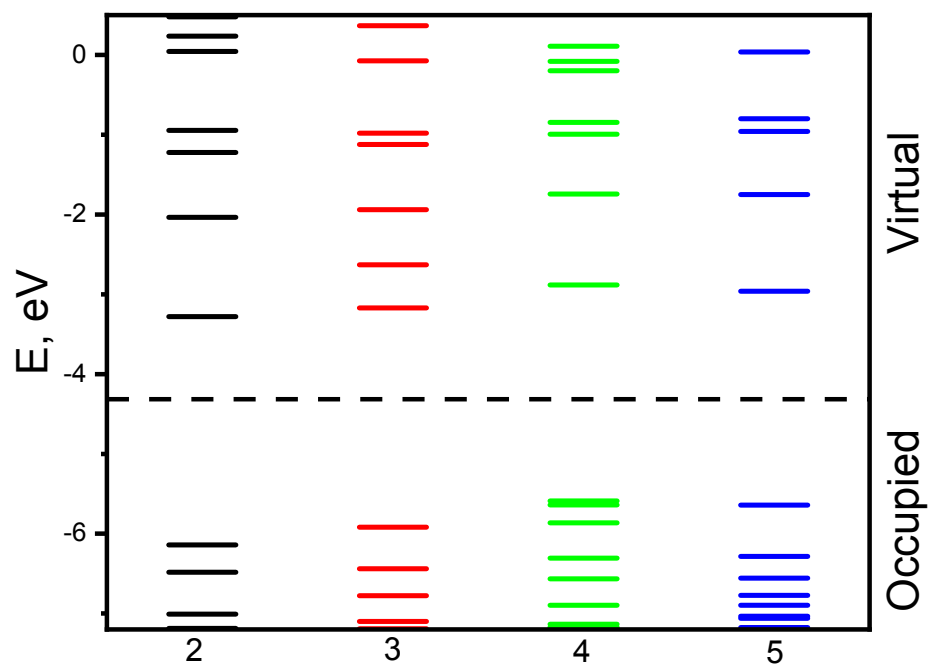

**Figure S14:** B3LYP  $\beta$ -spin relative energies of the frontier orbitals for compounds 2-5.

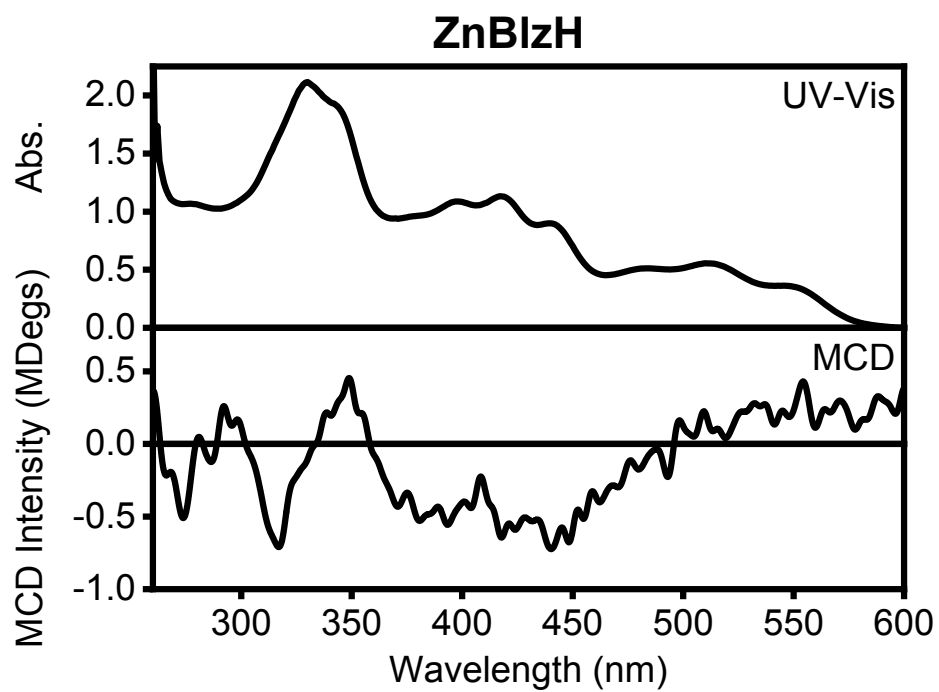

**Figure S15:** UV-Vis and MCD spectra of **5**.



**Table S1:** X-ray crystal data and structure parameters for compounds **1** and **2**.

| <b>Compound</b>                                         | <b>1</b>                                      | <b>2</b>                                       |
|---------------------------------------------------------|-----------------------------------------------|------------------------------------------------|
| <b>Empirical formula</b>                                | C <sub>11</sub> H <sub>9</sub> N <sub>5</sub> | C <sub>22</sub> H <sub>15</sub> N <sub>9</sub> |
| <b>Formula weight</b>                                   | 211.23                                        | 405.43                                         |
| <b>Crystal system</b>                                   | Monoclinic                                    | Monoclinic                                     |
| <b>Space group</b>                                      | C2/c                                          | P2 <sub>1</sub> /n                             |
| <b>a/ Å</b>                                             | 11.6141(5)                                    | 4.579(6)                                       |
| <b>b/ Å</b>                                             | 12.7038(5)                                    | 17.112(13)                                     |
| <b>c/ Å</b>                                             | 13.4922(6)                                    | 23.460(16)                                     |
| <b>α(°)</b>                                             | 90                                            | 92                                             |
| <b>β(°)</b>                                             | 99.080(3)                                     | 93.02(8)                                       |
| <b>γ(°)</b>                                             | 90                                            | 90                                             |
| <b>Volume (Å<sup>3</sup>)</b>                           | 1965.74(15)                                   | 1836(3)                                        |
| <b>Z</b>                                                | 8                                             | 4                                              |
| <b>D<sub>c</sub> (Mg/m<sup>3</sup>)</b>                 | 1.427                                         | 1.467                                          |
| <b>μ (mm<sup>-1</sup>)</b>                              | 0.757                                         | 0.772                                          |
| <b>F(000)</b>                                           | 880                                           | 840                                            |
| <b>reflns collected</b>                                 | 6403                                          | 11216                                          |
| <b>indep. reflns</b>                                    | 1687                                          | 3125                                           |
| <b>GOF on F<sup>2</sup></b>                             | 1.046                                         | 1.015                                          |
| <b>R1 (on F<sub>o</sub><sup>2</sup>, I &gt; 2σ(I))</b>  | 0.0461                                        | 0.0674                                         |
| <b>wR2 (on F<sub>o</sub><sup>2</sup>, I &gt; 2σ(I))</b> | 0.1266                                        | 0.1725                                         |
| <b>R1 (all data)</b>                                    | 0.0530                                        | 0.1127                                         |
| <b>wR2 (all data)</b>                                   | 0.1336                                        | 0.1976                                         |

**Table S2:** X-ray crystal data and structure parameters for compounds **3-5**.

| <b>Compound</b>                                         | <b>3</b>                                         | <b>4</b>                                                        | <b>5</b>                                                         |
|---------------------------------------------------------|--------------------------------------------------|-----------------------------------------------------------------|------------------------------------------------------------------|
| <b>Empirical formula</b>                                | C <sub>22</sub> H <sub>13</sub> CuN <sub>9</sub> | C <sub>24</sub> H <sub>21</sub> CoN <sub>9</sub> O <sub>2</sub> | C <sub>24</sub> H <sub>21</sub> N <sub>9</sub> O <sub>2</sub> Zn |
| <b>Formula weight</b>                                   | 466.95                                           | 526.43                                                          | 532.87                                                           |
| <b>Crystal system</b>                                   | Monoclinic                                       | Monoclinic                                                      | Monoclinic                                                       |
| <b>Space group</b>                                      | P2 <sub>1</sub> /n                               | P2 <sub>1</sub> /c                                              | P2 <sub>1</sub> /c                                               |
| <b>a/ Å</b>                                             | 4.6467(4)                                        | 6.8635(3)                                                       | 6.8862(4)                                                        |
| <b>b/ Å</b>                                             | 16.7271(17)                                      | 23.0498(13)                                                     | 23.1744(14)                                                      |
| <b>c/ Å</b>                                             | 23.289(2)                                        | 14.1576(8)                                                      | 14.2313(8)                                                       |
| <b>α(°)</b>                                             | 90                                               | 90                                                              | 90                                                               |
| <b>β(°)</b>                                             | 92.885(7)                                        | 102.251(3)                                                      | 102.434(4)                                                       |
| <b>γ(°)</b>                                             | 90                                               | 90                                                              | 90                                                               |
| <b>Volume (Å<sup>3</sup>)</b>                           | 1807.9(3)                                        | 2188.8(2)                                                       | 2217.8(2)                                                        |
| <b>Z</b>                                                | 4                                                | 4                                                               | 4                                                                |
| <b>Dc (Mg/m<sup>3</sup>)</b>                            | 1.716                                            | 1.598                                                           | 1.596                                                            |
| <b>μ (mm<sup>-1</sup>)</b>                              | 1.994                                            | 6.531                                                           | 1.153                                                            |
| <b>F(000)</b>                                           | 948                                              | 1084                                                            | 1096                                                             |
| <b>reflns collected</b>                                 | 8721                                             | 11209                                                           | 21335                                                            |
| <b>indep. reflns</b>                                    | 2876                                             | 3325                                                            | 5523                                                             |
| <b>GOF on F<sup>2</sup></b>                             | 1.008                                            | 1.050                                                           | 1.048                                                            |
| <b>R1 (on F<sub>o</sub><sup>2</sup>, I &gt; 2σ(I))</b>  | 0.0490                                           | 0.0468                                                          | 0.0511                                                           |
| <b>wR2 (on F<sub>o</sub><sup>2</sup>, I &gt; 2σ(I))</b> | 0.1239                                           | 0.1159                                                          | 0.1083                                                           |
| <b>R1 (all data)</b>                                    | 0.0851                                           | 0.0590                                                          | 0.0910                                                           |
| <b>wR2 (all data)</b>                                   | 0.1454                                           | 0.1228                                                          | 0.1229                                                           |

**Table S3:** B3LYP TDDFT-predicted energies and expansion coefficients for compound **2** (only excited states with  $f > 0.05$  and  $\lambda > 270$  nm are listed).

|                   |           |           |           |            |                                |
|-------------------|-----------|-----------|-----------|------------|--------------------------------|
| Excited State 1:  | Singlet-A | 2.4592 eV | 504.17 nm | $f=0.3090$ | $\langle S^{*2} \rangle=0.000$ |
| 105 ->106         | 0.70100   |           |           |            |                                |
| Excited State 2:  | Singlet-A | 2.8023 eV | 442.43 nm | $f=0.4910$ | $\langle S^{*2} \rangle=0.000$ |
| 104 ->106         | 0.69021   |           |           |            |                                |
| 105 ->107         | 0.10982   |           |           |            |                                |
| Excited State 6:  | Singlet-A | 3.5049 eV | 353.75 nm | $f=0.3514$ | $\langle S^{*2} \rangle=0.000$ |
| 101 ->106         | 0.69603   |           |           |            |                                |
| Excited State 10: | Singlet-A | 3.7046 eV | 334.67 nm | $f=0.7245$ | $\langle S^{*2} \rangle=0.000$ |
| 96 ->106          | -0.22629  |           |           |            |                                |
| 105 ->107         | 0.65249   |           |           |            |                                |
| Excited State 11: | Singlet-A | 3.9610 eV | 313.01 nm | $f=0.1170$ | $\langle S^{*2} \rangle=0.000$ |
| 96 ->106          | -0.47194  |           |           |            |                                |
| 104 ->107         | 0.48817   |           |           |            |                                |
| 105 ->107         | -0.10861  |           |           |            |                                |
| Excited State 12: | Singlet-A | 3.9786 eV | 311.63 nm | $f=0.2803$ | $\langle S^{*2} \rangle=0.000$ |
| 96 ->106          | 0.44692   |           |           |            |                                |
| 104 ->107         | 0.49200   |           |           |            |                                |
| 105 ->107         | 0.20010   |           |           |            |                                |
| Excited State 15: | Singlet-A | 4.3505 eV | 284.99 nm | $f=0.0579$ | $\langle S^{*2} \rangle=0.000$ |
| 94 ->106          | -0.13756  |           |           |            |                                |
| 103 ->107         | 0.66263   |           |           |            |                                |
| 105 ->108         | 0.12371   |           |           |            |                                |
| Excited State 17: | Singlet-A | 4.4945 eV | 275.86 nm | $f=0.2811$ | $\langle S^{*2} \rangle=0.000$ |
| 94 ->106          | 0.59067   |           |           |            |                                |
| 101 ->107         | 0.12483   |           |           |            |                                |
| 103 ->107         | 0.15040   |           |           |            |                                |
| 105 ->108         | -0.17464  |           |           |            |                                |
| 105 ->109         | -0.19579  |           |           |            |                                |

**Table S4:** B3LYP TDDFT-predicted energies and expansion coefficients for compound **4** (only excited states with  $f > 0.05$  and  $\lambda > 270$  nm are listed).

|                   |          |           |           |            |                                   |
|-------------------|----------|-----------|-----------|------------|-----------------------------------|
| Excited State 12: | 2.785-A  | 2.3209 eV | 534.20 nm | $f=0.0765$ | $\langle S^{**2} \rangle = 1.688$ |
| 132A ->137A       | 0.26486  |           |           |            |                                   |
| 133A ->137A       | 0.60604  |           |           |            |                                   |
| 134A ->140A       | -0.12426 |           |           |            |                                   |
| 135A ->137A       | 0.26959  |           |           |            |                                   |
| 136A ->137A       | 0.38617  |           |           |            |                                   |
| 132B ->136B       | 0.34280  |           |           |            |                                   |
| 133B ->136B       | -0.13364 |           |           |            |                                   |
| 134B ->136B       | 0.28425  |           |           |            |                                   |
| 135B ->136B       | -0.16384 |           |           |            |                                   |
| Excited State 13: | 2.374-A  | 2.4084 eV | 514.80 nm | $f=0.1838$ | $\langle S^{**2} \rangle = 1.159$ |
| 132A ->137A       | -0.32869 |           |           |            |                                   |
| 133A ->137A       | -0.18363 |           |           |            |                                   |
| 135A ->137A       | -0.29027 |           |           |            |                                   |
| 136A ->137A       | 0.51979  |           |           |            |                                   |
| 136A ->138A       | -0.10332 |           |           |            |                                   |
| 131B ->136B       | 0.22793  |           |           |            |                                   |
| 132B ->136B       | -0.22049 |           |           |            |                                   |
| 133B ->136B       | -0.36501 |           |           |            |                                   |
| 134B ->136B       | 0.25270  |           |           |            |                                   |
| 135B ->136B       | -0.35812 |           |           |            |                                   |
| Excited State 21: | 2.611-A  | 2.9470 eV | 420.72 nm | $f=0.1167$ | $\langle S^{**2} \rangle = 1.454$ |
| 131A ->137A       | -0.13217 |           |           |            |                                   |
| 132A ->137A       | -0.47178 |           |           |            |                                   |
| 133A ->137A       | -0.11416 |           |           |            |                                   |
| 136A ->138A       | -0.11620 |           |           |            |                                   |
| 129B ->136B       | -0.10328 |           |           |            |                                   |
| 130B ->136B       | 0.15923  |           |           |            |                                   |
| 131B ->140B       | 0.21303  |           |           |            |                                   |
| 132B ->136B       | 0.50229  |           |           |            |                                   |
| 133B ->137B       | 0.11626  |           |           |            |                                   |
| 134B ->137B       | 0.35201  |           |           |            |                                   |
| 135B ->137B       | -0.42651 |           |           |            |                                   |
| Excited State 22: | 2.933-A  | 2.9792 eV | 416.16 nm | $f=0.1352$ | $\langle S^{**2} \rangle = 1.901$ |
| 129A ->137A       | -0.15933 |           |           |            |                                   |
| 131A ->137A       | 0.18525  |           |           |            |                                   |
| 132A ->137A       | -0.43366 |           |           |            |                                   |
| 133A ->138A       | 0.15732  |           |           |            |                                   |
| 135A ->137A       | 0.12112  |           |           |            |                                   |
| 136A ->138A       | 0.36069  |           |           |            |                                   |
| 128B ->136B       | -0.11927 |           |           |            |                                   |
| 129B ->136B       | 0.15826  |           |           |            |                                   |
| 130B ->136B       | -0.14897 |           |           |            |                                   |

|                   |          |           |           |          |              |
|-------------------|----------|-----------|-----------|----------|--------------|
| 132B ->136B       | 0.40231  |           |           |          |              |
| 133B ->137B       | -0.11569 |           |           |          |              |
| 135B ->137B       | 0.50777  |           |           |          |              |
| Excited State 27: | 2.990-A  | 3.3015 eV | 375.54 nm | f=0.0950 | <S**2>=1.986 |
| 129A ->137A       | -0.37287 |           |           |          |              |
| 131A ->137A       | 0.26155  |           |           |          |              |
| 132A ->137A       | 0.10719  |           |           |          |              |
| 135A ->138A       | -0.26136 |           |           |          |              |
| 136A ->138A       | 0.28184  |           |           |          |              |
| 127B ->136B       | 0.24347  |           |           |          |              |
| 128B ->136B       | -0.18783 |           |           |          |              |
| 129B ->136B       | 0.16008  |           |           |          |              |
| 132B ->136B       | -0.12724 |           |           |          |              |
| 133B ->137B       | 0.42969  |           |           |          |              |
| 134B ->137B       | 0.25685  |           |           |          |              |
| 135B ->137B       | -0.32391 |           |           |          |              |
| Excited State 32: | 2.978-A  | 3.4816 eV | 356.12 nm | f=0.0946 | <S**2>=1.968 |
| 125A ->137A       | 0.11821  |           |           |          |              |
| 126A ->137A       | 0.19008  |           |           |          |              |
| 128A ->137A       | 0.28974  |           |           |          |              |
| 129A ->137A       | -0.26413 |           |           |          |              |
| 133A ->138A       | -0.21570 |           |           |          |              |
| 135A ->138A       | 0.45049  |           |           |          |              |
| 136A ->138A       | -0.31823 |           |           |          |              |
| 126B ->136B       | -0.28663 |           |           |          |              |
| 127B ->136B       | 0.21566  |           |           |          |              |
| 128B ->136B       | -0.18491 |           |           |          |              |
| 129B ->136B       | 0.22202  |           |           |          |              |
| 130B ->136B       | -0.11108 |           |           |          |              |
| 133B ->137B       | 0.24949  |           |           |          |              |
| 135B ->137B       | 0.14540  |           |           |          |              |
| Excited State 34: | 2.331-A  | 3.5643 eV | 347.85 nm | f=0.3552 | <S**2>=1.109 |
| 126A ->137A       | 0.10762  |           |           |          |              |
| 131A ->137A       | -0.24184 |           |           |          |              |
| 133A ->138A       | 0.15825  |           |           |          |              |
| 134A ->138A       | 0.14319  |           |           |          |              |
| 135A ->138A       | 0.36431  |           |           |          |              |
| 136A ->138A       | 0.52475  |           |           |          |              |
| 126B ->136B       | -0.12094 |           |           |          |              |
| 127B ->136B       | 0.11745  |           |           |          |              |
| 130B ->136B       | -0.12333 |           |           |          |              |
| 132B ->136B       | -0.13071 |           |           |          |              |
| 132B ->137B       | -0.12723 |           |           |          |              |
| 133B ->137B       | -0.33816 |           |           |          |              |
| 134B ->137B       | 0.41460  |           |           |          |              |
| 135B ->137B       | -0.11129 |           |           |          |              |

|                   |          |           |           |          |              |
|-------------------|----------|-----------|-----------|----------|--------------|
| 135B ->138B       | -0.11156 |           |           |          |              |
| Excited State 39: | 2.138-A  | 3.7010 eV | 335.00 nm | f=0.2791 | <S**2>=0.893 |
| 125A ->137A       | 0.14247  |           |           |          |              |
| 128A ->137A       | 0.40104  |           |           |          |              |
| 129A ->137A       | -0.45890 |           |           |          |              |
| 127B ->136B       | -0.49361 |           |           |          |              |
| 128B ->136B       | 0.51759  |           |           |          |              |
| Excited State 40: | 3.153-A  | 3.7163 eV | 333.62 nm | f=0.0729 | <S**2>=2.235 |
| 125A ->137A       | 0.13577  |           |           |          |              |
| 126A ->137A       | -0.15285 |           |           |          |              |
| 128A ->137A       | 0.10627  |           |           |          |              |
| 128A ->138A       | -0.10190 |           |           |          |              |
| 129A ->137A       | 0.31526  |           |           |          |              |
| 132A ->138A       | -0.18054 |           |           |          |              |
| 133A ->138A       | 0.31989  |           |           |          |              |
| 135A ->138A       | -0.11143 |           |           |          |              |
| 135A ->139A       | 0.11924  |           |           |          |              |
| 136A ->139A       | -0.22569 |           |           |          |              |
| 136A ->140A       | 0.14853  |           |           |          |              |
| 136A ->141A       | 0.21535  |           |           |          |              |
| 124B ->136B       | -0.18240 |           |           |          |              |
| 126B ->136B       | -0.12674 |           |           |          |              |
| 127B ->139B       | 0.11218  |           |           |          |              |
| 129B ->136B       | -0.11938 |           |           |          |              |
| 133B ->137B       | 0.30546  |           |           |          |              |
| 133B ->138B       | -0.17212 |           |           |          |              |
| 133B ->139B       | 0.17244  |           |           |          |              |
| 135B ->138B       | -0.20176 |           |           |          |              |
| 135B ->139B       | 0.20156  |           |           |          |              |

**Table S5:** B3LYP TDDFT-predicted energies and expansion coefficients for compound **3** (only excited states with  $f > 0.05$  and  $\lambda > 270$  nm are listed).

|                   |          |           |           |            |                             |
|-------------------|----------|-----------|-----------|------------|-----------------------------|
| Excited State 5:  | 2.004-A  | 2.3456 eV | 528.59 nm | $f=0.3010$ | $\langle S^2 \rangle=0.754$ |
| 119A ->120A       | 0.69956  |           |           |            |                             |
| 118B ->119B       | 0.70259  |           |           |            |                             |
| Excited State 12: | 2.067-A  | 2.8461 eV | 435.63 nm | $f=0.3752$ | $\langle S^2 \rangle=0.818$ |
| 116A ->120A       | 0.18388  |           |           |            |                             |
| 118A ->120A       | 0.68381  |           |           |            |                             |
| 119A ->121A       | 0.13893  |           |           |            |                             |
| 117B ->119B       | 0.65881  |           |           |            |                             |
| Excited State 26: | 2.143-A  | 3.5332 eV | 350.91 nm | $f=0.3358$ | $\langle S^2 \rangle=0.898$ |
| 113A ->120A       | 0.30938  |           |           |            |                             |
| 119A ->121A       | 0.52709  |           |           |            |                             |
| 109B ->119B       | 0.17923  |           |           |            |                             |
| 112B ->119B       | 0.37356  |           |           |            |                             |
| 113B ->120B       | 0.23212  |           |           |            |                             |
| 117B ->119B       | -0.12884 |           |           |            |                             |
| 117B ->121B       | -0.16996 |           |           |            |                             |
| 118B ->121B       | 0.55269  |           |           |            |                             |
| Excited State 29: | 2.011-A  | 3.5752 eV | 346.79 nm | $f=0.5110$ | $\langle S^2 \rangle=0.761$ |
| 113A ->120A       | 0.57761  |           |           |            |                             |
| 119A ->121A       | -0.33367 |           |           |            |                             |
| 112B ->119B       | 0.61157  |           |           |            |                             |
| 113B ->120B       | -0.16013 |           |           |            |                             |
| 118B ->121B       | -0.32950 |           |           |            |                             |
| Excited State 31: | 2.057-A  | 3.7582 eV | 329.90 nm | $f=0.0810$ | $\langle S^2 \rangle=0.808$ |
| 111A ->120A       | -0.34604 |           |           |            |                             |
| 118A ->121A       | 0.10345  |           |           |            |                             |
| 119A ->121A       | -0.14095 |           |           |            |                             |
| 97B ->120B        | -0.12607 |           |           |            |                             |
| 109B ->119B       | -0.11586 |           |           |            |                             |
| 110B ->120B       | 0.16399  |           |           |            |                             |
| 111B ->119B       | -0.33941 |           |           |            |                             |
| 113B ->120B       | 0.75648  |           |           |            |                             |
| 117B ->121B       | 0.11008  |           |           |            |                             |
| 118B ->121B       | -0.17835 |           |           |            |                             |
| Excited State 32: | 2.016-A  | 3.7908 eV | 327.06 nm | $f=0.0623$ | $\langle S^2 \rangle=0.766$ |
| 109A ->120A       | -0.20685 |           |           |            |                             |
| 111A ->120A       | 0.61494  |           |           |            |                             |
| 119A ->121A       | -0.10229 |           |           |            |                             |
| 109B ->119B       | -0.10131 |           |           |            |                             |
| 110B ->120B       | 0.11666  |           |           |            |                             |
| 111B ->119B       | 0.56910  |           |           |            |                             |
| 113B ->120B       | 0.42505  |           |           |            |                             |

Excited State 36: 2.172-A 3.9645 eV 312.74 nm f=0.0823 <S\*\*2>=0.929

|             |          |
|-------------|----------|
| 109A ->120A | 0.50418  |
| 111A ->120A | 0.12638  |
| 118A ->121A | 0.29162  |
| 108B ->119B | -0.16458 |
| 109B ->119B | 0.57469  |
| 116B ->121B | 0.11064  |
| 117B ->121B | 0.42903  |

Excited State 40: 2.029-A 4.0378 eV 307.06 nm f=0.3370 <S\*\*2>=0.779

|             |          |
|-------------|----------|
| 108A ->120A | -0.13113 |
| 109A ->120A | -0.31193 |
| 118A ->121A | 0.59298  |
| 119A ->121A | 0.11805  |
| 109B ->119B | -0.32898 |
| 110B ->120B | 0.10846  |
| 113B ->120B | -0.20414 |
| 117B ->121B | 0.53710  |
| 118B ->121B | 0.12619  |



**Table S6:** B3LYP TDDFT-predicted energies and expansion coefficients for compound **5** (only excited states with  $f > 0.05$  and  $\lambda > 270$  nm are listed).

|                   |           |           |           |            |                                |
|-------------------|-----------|-----------|-----------|------------|--------------------------------|
| Excited State 1:  | Singlet-A | 2.2998 eV | 539.10 nm | $f=0.3175$ | $\langle S^{*2} \rangle=0.000$ |
| 137 ->138         | 0.70435   |           |           |            |                                |
| Excited State 2:  | Singlet-A | 2.8993 eV | 427.63 nm | $f=0.3693$ | $\langle S^{*2} \rangle=0.000$ |
| 136 ->138         | 0.67795   |           |           |            |                                |
| 137 ->139         | 0.15393   |           |           |            |                                |
| Excited State 8:  | Singlet-A | 3.5090 eV | 353.33 nm | $f=0.4289$ | $\langle S^{*2} \rangle=0.000$ |
| 128 ->138         | -0.43740  |           |           |            |                                |
| 136 ->138         | -0.11440  |           |           |            |                                |
| 137 ->139         | 0.51376   |           |           |            |                                |
| Excited State 9:  | Singlet-A | 3.5213 eV | 352.10 nm | $f=0.3174$ | $\langle S^{*2} \rangle=0.000$ |
| 128 ->138         | 0.52839   |           |           |            |                                |
| 136 ->138         | -0.10473  |           |           |            |                                |
| 137 ->139         | 0.41969   |           |           |            |                                |
| Excited State 10: | Singlet-A | 3.6391 eV | 340.70 nm | $f=0.3738$ | $\langle S^{*2} \rangle=0.000$ |
| 130 ->138         | 0.68749   |           |           |            |                                |
| Excited State 12: | Singlet-A | 4.0062 eV | 309.48 nm | $f=0.0669$ | $\langle S^{*2} \rangle=0.000$ |
| 127 ->138         | 0.63824   |           |           |            |                                |
| 136 ->139         | 0.23401   |           |           |            |                                |
| Excited State 13: | Singlet-A | 4.0562 eV | 305.67 nm | $f=0.2337$ | $\langle S^{*2} \rangle=0.000$ |
| 127 ->138         | -0.23395  |           |           |            |                                |
| 136 ->139         | 0.64242   |           |           |            |                                |
| Excited State 15: | Singlet-A | 4.2103 eV | 294.47 nm | $f=0.0684$ | $\langle S^{*2} \rangle=0.000$ |
| 137 ->140         | 0.62622   |           |           |            |                                |
| 137 ->141         | -0.28431  |           |           |            |                                |
| 135 ->139         | -0.16253  |           |           |            |                                |
| Excited State 21: | Singlet-A | 4.4883 eV | 276.24 nm | $f=0.0888$ | $\langle S^{*2} \rangle=0.000$ |
| 124 ->138         | -0.14312  |           |           |            |                                |
| 125 ->138         | 0.48380   |           |           |            |                                |
| 133 ->139         | 0.42682   |           |           |            |                                |
| Excited State 23: | Singlet-A | 4.5644 eV | 271.63 nm | $f=0.1585$ | $\langle S^{*2} \rangle=0.000$ |
| 123 ->138         | 0.13534   |           |           |            |                                |
| 124 ->138         | 0.13912   |           |           |            |                                |
| 125 ->138         | -0.38292  |           |           |            |                                |
| 133 ->139         | 0.50938   |           |           |            |                                |
| 137 ->141         | 0.10430   |           |           |            |                                |

**Table S7:** B3LYP DFT optimized geometry of compound **2**.

| Center<br>Number | Atomic<br>Number | Atomic<br>Type | Coordinates (Angstroms) |           |           |
|------------------|------------------|----------------|-------------------------|-----------|-----------|
|                  |                  |                | X                       | Y         | Z         |
| 1                | 6                | 0              | 2.782980                | 4.459405  | -0.000074 |
| 2                | 1                | 0              | 2.925576                | 5.530171  | -0.000240 |
| 3                | 6                | 0              | 3.737891                | 3.439037  | -0.000402 |
| 4                | 1                | 0              | 4.813435                | 3.519249  | -0.000885 |
| 5                | 6                | 0              | 3.003344                | 2.246232  | 0.000021  |
| 6                | 6                | 0              | 2.791933                | -0.100460 | -0.000039 |
| 7                | 6                | 0              | 3.417048                | -1.436440 | -0.000153 |
| 8                | 6                | 0              | 4.739860                | -1.861764 | -0.000125 |
| 9                | 1                | 0              | 5.558811                | -1.150650 | -0.000160 |
| 10               | 6                | 0              | 4.974011                | -3.241619 | -0.000042 |
| 11               | 1                | 0              | 5.994504                | -3.611123 | -0.000018 |
| 12               | 6                | 0              | 3.913438                | -4.158666 | 0.000026  |
| 13               | 1                | 0              | 4.130419                | -5.221975 | 0.000113  |
| 14               | 6                | 0              | 2.584134                | -3.723214 | 0.000002  |
| 15               | 1                | 0              | 1.758772                | -4.426597 | 0.000056  |
| 16               | 6                | 0              | 2.361111                | -2.350445 | -0.000101 |
| 17               | 6                | 0              | 1.131977                | -1.537903 | 0.000008  |
| 18               | 6                | 0              | -1.213996               | -1.535576 | 0.000004  |
| 19               | 6                | 0              | -2.513076               | -2.213207 | 0.000034  |
| 20               | 6                | 0              | -2.828548               | -3.569211 | 0.000144  |
| 21               | 1                | 0              | -2.048523               | -4.321942 | 0.000247  |
| 22               | 6                | 0              | -4.179946               | -3.917321 | 0.000135  |
| 23               | 1                | 0              | -4.464469               | -4.964133 | 0.000216  |
| 24               | 6                | 0              | -5.180124               | -2.932699 | 0.000027  |
| 25               | 1                | 0              | -6.221992               | -3.235456 | 0.000017  |
| 26               | 6                | 0              | -4.859513               | -1.573320 | -0.000076 |
| 27               | 1                | 0              | -5.629863               | -0.810544 | -0.000137 |
| 28               | 6                | 0              | -3.511884               | -1.229072 | -0.000079 |
| 29               | 6                | 0              | -2.852141               | 0.081043  | -0.000150 |
| 30               | 6                | 0              | -2.800435               | 2.427653  | -0.000117 |
| 31               | 6                | 0              | -3.459386               | 3.682185  | -0.000323 |
| 32               | 1                | 0              | -4.523839               | 3.854657  | -0.000612 |
| 33               | 6                | 0              | -2.442373               | 4.613336  | -0.000087 |
| 34               | 1                | 0              | -2.448715               | 5.692142  | -0.000088 |
| 35               | 7                | 0              | 1.536815                | 3.962112  | 0.000495  |
| 36               | 7                | 0              | 1.690270                | 2.626229  | 0.000522  |
| 37               | 1                | 0              | 0.881184                | 2.016625  | 0.000872  |
| 38               | 7                | 0              | 3.510769                | 0.978653  | -0.000064 |
| 39               | 7                | 0              | 1.391214                | -0.226251 | 0.000087  |
| 40               | 7                | 0              | -0.067867               | -2.168297 | 0.000091  |
| 41               | 7                | 0              | -1.473821               | -0.191790 | -0.000130 |
| 42               | 1                | 0              | -0.754961               | 0.523785  | -0.000199 |
| 43               | 7                | 0              | -3.457806               | 1.214767  | -0.000180 |
| 44               | 7                | 0              | -1.457363               | 2.590151  | 0.000187  |
| 45               | 7                | 0              | -1.278166               | 3.919615  | 0.000235  |
| 46               | 1                | 0              | -0.306488               | 4.261623  | 0.000333  |

$E_h = -1340.432492$  Hartree

**Table S8:** B3LYP DFT optimized geometry of compound **4**.

| Center<br>Number | Atomic<br>Number | Atomic<br>Type | Coordinates (Angstroms) |           |           |
|------------------|------------------|----------------|-------------------------|-----------|-----------|
|                  |                  |                | X                       | Y         | Z         |
| 1                | 6                | 0              | -2.346697               | -4.215028 | 0.269936  |
| 2                | 1                | 0              | -2.361510               | -5.292449 | 0.360639  |
| 3                | 6                | 0              | -3.388028               | -3.309595 | 0.176410  |
| 4                | 1                | 0              | -4.453486               | -3.481584 | 0.178723  |
| 5                | 6                | 0              | -2.748848               | -2.058851 | 0.081843  |
| 6                | 6                | 0              | -2.786352               | 0.258199  | -0.016240 |
| 7                | 6                | 0              | -3.489566               | 1.540966  | -0.068160 |
| 8                | 6                | 0              | -4.841328               | 1.867341  | -0.138580 |
| 9                | 1                | 0              | -5.602461               | 1.095596  | -0.177164 |
| 10               | 6                | 0              | -5.176956               | 3.222868  | -0.159579 |
| 11               | 1                | 0              | -6.220723               | 3.515393  | -0.215894 |
| 12               | 6                | 0              | -4.187303               | 4.218716  | -0.109202 |
| 13               | 1                | 0              | -4.483484               | 5.262731  | -0.126615 |
| 14               | 6                | 0              | -2.833590               | 3.885359  | -0.037887 |
| 15               | 1                | 0              | -2.063582               | 4.647954  | 0.001322  |
| 16               | 6                | 0              | -2.506285               | 2.531117  | -0.018218 |
| 17               | 6                | 0              | -1.221247               | 1.834369  | 0.045210  |
| 18               | 6                | 0              | 1.087125                | 1.905251  | 0.044322  |
| 19               | 6                | 0              | 2.335264                | 2.673239  | 0.062699  |
| 20               | 6                | 0              | 2.589186                | 4.039940  | 0.141982  |
| 21               | 1                | 0              | 1.779041                | 4.757229  | 0.213417  |
| 22               | 6                | 0              | 3.925494                | 4.446896  | 0.128632  |
| 23               | 1                | 0              | 4.165297                | 5.503562  | 0.190746  |
| 24               | 6                | 0              | 4.967784                | 3.510862  | 0.036386  |
| 25               | 1                | 0              | 5.995316                | 3.860263  | 0.028503  |
| 26               | 6                | 0              | 4.703987                | 2.140884  | -0.044206 |
| 27               | 1                | 0              | 5.505148                | 1.413244  | -0.114747 |
| 28               | 6                | 0              | 3.370848                | 1.743447  | -0.029175 |
| 29               | 6                | 0              | 2.736143                | 0.422223  | -0.088695 |
| 30               | 6                | 0              | 2.836911                | -1.889110 | -0.172779 |
| 31               | 6                | 0              | 3.539199                | -3.111841 | -0.269120 |
| 32               | 1                | 0              | 4.606655                | -3.225930 | -0.368359 |
| 33               | 6                | 0              | 2.569110                | -4.088299 | -0.197947 |
| 34               | 1                | 0              | 2.626177                | -5.165525 | -0.222646 |
| 35               | 6                | 0              | 0.437209                | -1.872383 | 3.111066  |
| 36               | 1                | 0              | -0.178529               | -2.750452 | 2.898316  |
| 37               | 1                | 0              | 0.386490                | -1.626338 | 4.175164  |
| 38               | 1                | 0              | 1.469969                | -2.079344 | 2.838635  |
| 39               | 6                | 0              | 0.001975                | -2.013752 | -3.060863 |
| 40               | 1                | 0              | 1.008624                | -2.441731 | -3.042460 |
| 41               | 1                | 0              | -0.293604               | -1.803988 | -4.092581 |

|    |    |   |           |           |           |
|----|----|---|-----------|-----------|-----------|
| 42 | 1  | 0 | -0.699098 | -2.717823 | -2.618436 |
| 43 | 27 | 0 | 0.007137  | -0.852720 | 0.022118  |
| 44 | 7  | 0 | -1.163608 | -3.566586 | 0.232306  |
| 45 | 7  | 0 | -1.389195 | -2.237822 | 0.114636  |
| 46 | 7  | 0 | -3.410466 | -0.872508 | -0.007272 |
| 47 | 7  | 0 | -1.398950 | 0.489406  | 0.051256  |
| 48 | 7  | 0 | -0.082379 | 2.522028  | 0.079195  |
| 49 | 7  | 0 | 1.342547  | 0.569428  | -0.043308 |
| 50 | 7  | 0 | 3.433868  | -0.664445 | -0.168386 |
| 51 | 7  | 0 | 1.500779  | -2.127888 | -0.052952 |
| 52 | 7  | 0 | 1.377917  | -3.469856 | -0.071929 |
| 53 | 1  | 0 | 0.382337  | -3.821702 | 0.055815  |
| 54 | 8  | 0 | 0.029925  | -0.747022 | 2.316336  |
| 55 | 8  | 0 | -0.075113 | -0.821809 | -2.264741 |
| 56 | 1  | 0 | 0.546853  | -0.170320 | -2.613333 |
| 57 | 1  | 0 | -0.864434 | -0.493907 | 2.579161  |

---

$E_h = -2953.612817$  Hartree

**Table S9:** B3LYP DFT optimized geometry of compound **3**

| Center<br>Number | Atomic<br>Number | Atomic<br>Type | Coordinates (Angstroms) |           |           |
|------------------|------------------|----------------|-------------------------|-----------|-----------|
|                  |                  |                | X                       | Y         | Z         |
| 1                | 6                | 0              | -2.558415               | 4.350422  | 0.001502  |
| 2                | 1                | 0              | -2.611733               | 5.427912  | 0.002072  |
| 3                | 6                | 0              | -3.540974               | 3.379134  | 0.000905  |
| 4                | 1                | 0              | -4.611388               | 3.506584  | 0.000860  |
| 5                | 6                | 0              | -2.845944               | 2.151299  | 0.000390  |
| 6                | 6                | 0              | -2.772017               | -0.174885 | -0.000135 |
| 7                | 6                | 0              | -3.420713               | -1.493477 | -0.000541 |
| 8                | 6                | 0              | -4.757796               | -1.874524 | -0.001094 |
| 9                | 1                | 0              | -5.551815               | -1.136088 | -0.001378 |
| 10               | 6                | 0              | -5.035378               | -3.244628 | -0.001267 |
| 11               | 1                | 0              | -6.066954               | -3.581432 | -0.001694 |
| 12               | 6                | 0              | -4.003972               | -4.196181 | -0.000893 |
| 13               | 1                | 0              | -4.255550               | -5.251665 | -0.001035 |
| 14               | 6                | 0              | -2.662621               | -3.805492 | -0.000342 |
| 15               | 1                | 0              | -1.859486               | -4.533791 | -0.000059 |
| 16               | 6                | 0              | -2.395437               | -2.439748 | -0.000168 |
| 17               | 6                | 0              | -1.134708               | -1.688046 | 0.000354  |
| 18               | 6                | 0              | 1.185265                | -1.658799 | 0.000565  |
| 19               | 6                | 0              | 2.459058                | -2.380935 | 0.000676  |
| 20               | 6                | 0              | 2.756119                | -3.741974 | 0.001010  |
| 21               | 1                | 0              | 1.968227                | -4.486828 | 0.001410  |
| 22               | 6                | 0              | 4.103937                | -4.104443 | 0.000836  |
| 23               | 1                | 0              | 4.378333                | -5.154262 | 0.001114  |
| 24               | 6                | 0              | 5.115294                | -3.129729 | 0.000291  |
| 25               | 1                | 0              | 6.153817                | -3.444872 | 0.000136  |
| 26               | 6                | 0              | 4.810129                | -1.766693 | -0.000081 |
| 27               | 1                | 0              | 5.589611                | -1.012852 | -0.000506 |
| 28               | 6                | 0              | 3.464756                | -1.410299 | 0.000119  |
| 29               | 6                | 0              | 2.788768                | -0.110018 | -0.000242 |
| 30               | 6                | 0              | 2.792131                | 2.222563  | -0.001044 |
| 31               | 6                | 0              | 3.455596                | 3.461945  | -0.001732 |
| 32               | 1                | 0              | 4.523983                | 3.614141  | -0.002403 |
| 33               | 6                | 0              | 2.431844                | 4.397596  | -0.001396 |
| 34               | 1                | 0              | 2.475015                | 5.477843  | -0.001658 |
| 35               | 29               | 0              | 0.003042                | 1.074077  | 0.000194  |
| 36               | 7                | 0              | -1.367778               | 3.723382  | 0.001428  |
| 37               | 1                | 0              | -0.365273               | 4.064840  | 0.000861  |
| 38               | 7                | 0              | -1.506492               | 2.384603  | 0.000674  |
| 39               | 7                | 0              | -3.450908               | 0.924295  | -0.000180 |
| 40               | 7                | 0              | -1.379663               | -0.349477 | 0.000392  |
| 41               | 7                | 0              | 0.027582                | -2.321771 | 0.000722  |
| 42               | 7                | 0              | 1.396630                | -0.323140 | 0.000112  |
| 43               | 7                | 0              | 3.425288                | 1.012768  | -0.000850 |
| 44               | 7                | 0              | 1.439187                | 2.443266  | -0.000298 |
| 45               | 7                | 0              | 1.235509                | 3.778035  | -0.000513 |

 $E_h = -2979.786503$  Hartree

**Table S10:** B3LYP DFT optimized geometry of compound **5**.

| Center<br>Number | Atomic<br>Number | Atomic<br>Type | Coordinates (Angstroms) |           |           |
|------------------|------------------|----------------|-------------------------|-----------|-----------|
|                  |                  |                | X                       | Y         | Z         |
| 1                | 6                | 0              | 2.818163                | -4.071130 | 0.029343  |
| 2                | 1                | 0              | 2.944761                | -5.142343 | 0.048662  |
| 3                | 6                | 0              | 3.733809                | -3.036943 | -0.031094 |
| 4                | 1                | 0              | 4.809294                | -3.105112 | -0.070387 |
| 5                | 6                | 0              | 2.960299                | -1.849502 | -0.027661 |
| 6                | 6                | 0              | 2.750884                | 0.501655  | -0.071081 |
| 7                | 6                | 0              | 3.339774                | 1.854782  | -0.095886 |
| 8                | 6                | 0              | 4.656114                | 2.300654  | -0.128022 |
| 9                | 1                | 0              | 5.483436                | 1.599427  | -0.142668 |
| 10               | 6                | 0              | 4.872466                | 3.682392  | -0.140876 |
| 11               | 1                | 0              | 5.887625                | 4.065567  | -0.165993 |
| 12               | 6                | 0              | 3.798961                | 4.584557  | -0.121326 |
| 13               | 1                | 0              | 4.000520                | 5.650905  | -0.131313 |
| 14               | 6                | 0              | 2.477125                | 4.130433  | -0.088839 |
| 15               | 1                | 0              | 1.641782                | 4.821858  | -0.073047 |
| 16               | 6                | 0              | 2.268972                | 2.755062  | -0.076358 |
| 17               | 6                | 0              | 1.037927                | 1.943164  | -0.046075 |
| 18               | 6                | 0              | -1.311598               | 1.823970  | -0.010026 |
| 19               | 6                | 0              | -2.615749               | 2.504878  | -0.008535 |
| 20               | 6                | 0              | -2.967225               | 3.851879  | -0.019412 |
| 21               | 1                | 0              | -2.208299               | 4.626702  | -0.029171 |
| 22               | 6                | 0              | -4.328336               | 4.166691  | -0.016297 |
| 23               | 1                | 0              | -4.640327               | 5.206195  | -0.023889 |
| 24               | 6                | 0              | -5.302235               | 3.156434  | -0.003103 |
| 25               | 1                | 0              | -6.352199               | 3.431962  | -0.001241 |
| 26               | 6                | 0              | -4.944434               | 1.805235  | 0.007697  |
| 27               | 1                | 0              | -5.696557               | 1.023645  | 0.017978  |
| 28               | 6                | 0              | -3.588327               | 1.494166  | 0.004520  |
| 29               | 6                | 0              | -2.860042               | 0.214830  | 0.015970  |
| 30               | 6                | 0              | -2.795233               | -2.154653 | 0.059825  |
| 31               | 6                | 0              | -3.441167               | -3.407466 | 0.059214  |
| 32               | 1                | 0              | -4.506375               | -3.582956 | 0.036807  |
| 33               | 6                | 0              | -2.402438               | -4.330322 | 0.093783  |
| 34               | 1                | 0              | -2.440854               | -5.411568 | 0.105099  |
| 35               | 6                | 0              | 0.019924                | -2.117926 | -3.085223 |
| 36               | 1                | 0              | 1.034058                | -2.500687 | -3.232398 |
| 37               | 1                | 0              | -0.433493               | -1.884236 | -4.052206 |
| 38               | 1                | 0              | -0.580197               | -2.866027 | -2.572124 |
| 39               | 6                | 0              | 0.995342                | -0.907037 | 3.244700  |
| 40               | 1                | 0              | 1.626665                | -1.800324 | 3.249910  |
| 41               | 1                | 0              | 0.591669                | -0.730996 | 4.245293  |

|    |    |   |           |           |           |
|----|----|---|-----------|-----------|-----------|
| 42 | 1  | 0 | 1.588535  | -0.047147 | 2.940290  |
| 43 | 1  | 0 | -0.635216 | -1.767488 | 2.520169  |
| 44 | 1  | 0 | 0.571544  | -0.271436 | -2.627618 |
| 45 | 7  | 0 | 1.586863  | -3.514022 | 0.067221  |
| 46 | 1  | 0 | 0.628311  | -3.919297 | 0.105212  |
| 47 | 7  | 0 | 1.648759  | -2.173037 | 0.032621  |
| 48 | 7  | 0 | 3.478977  | -0.573382 | -0.068954 |
| 49 | 7  | 0 | 1.359891  | 0.622505  | -0.045947 |
| 50 | 7  | 0 | -0.159521 | 2.518503  | -0.030263 |
| 51 | 7  | 0 | -1.487085 | 0.494209  | 0.004886  |
| 52 | 7  | 0 | -3.444277 | -0.942220 | 0.035714  |
| 53 | 7  | 0 | -1.443232 | -2.366610 | 0.096903  |
| 54 | 7  | 0 | -1.206024 | -3.698992 | 0.117294  |
| 55 | 8  | 0 | 0.019363  | -0.959866 | -2.236551 |
| 56 | 8  | 0 | -0.066701 | -1.022053 | 2.287481  |
| 57 | 30 | 0 | -0.010477 | -0.916159 | 0.023581  |

---

$E_h = -3350.167009$  Hartree

## References

- 1 I.-S. Tamgho, J. T. Engle and C. J. Ziegler, *Tetrahedron Lett.*, 2013, **54**, 6114–6117.
- 2 G. M. Sheldrick, *Acta Crystallogr. Sect. A Found. Crystallogr.*, 2008, **64**, 112–122.
- 3 P. J. Stephens, F. J. Devlin, C. F. Chabalowski and M. J. Frisch, *J. Phys. Chem.*, 1994, **98**, 11623–11627.
- 4 J. Tomasi, B. Mennucci and R. Cammi, *Chem. Rev.*, 2005, **105**, 2999–3093.
- 5 A. D. McLean and G. S. Chandler, *J. Chem. Phys.*, 1980, **72**, 5639–5648.
- 6 M. J. Frisch, G. W. Trucks, H. B. Schlegel, G. E. Scuseria, Ma. Robb, J. R. Cheeseman, G. Scalmani, V. Barone, B. Mennucci and G. A. Petersson, *Inc. Wallingford, CT*.
- 7 Tenderholt, Adam L. *QMForge*, Version 2.4, <https://qmforge.net>
